# Supplementary material for: Approaching the free rotor limit: extremely low methyl torsional barrier observed in the microwave spectrum of 2,4-dimethylfluorobenzene
Source: Royal Society of Chemistry journal article supplement (doi:10.1039/d3cp04748b), 2023-11-27
Supplement: d3cp04748b1.pdf [file d3cp04748b1.pdf]

## Supplementary Information

### Approaching the free rotor limit: Extremely low methyl torsional barrier observed in the microwave spectrum of 2,4-dimethylfluorobenzene

Safa Khemissi,<sup>†a</sup> Martin Schwell,<sup>a</sup> Isabelle Kleiner<sup>b</sup> and Ha Vinh Lam Nguyen<sup>†a,c\*</sup>

---

<sup>a</sup> *Univ Paris Est Creteil and Université Paris Cité, CNRS, LISA, F-94010 Créteil, France*

<sup>b</sup> *Université Paris Cité and Univ Paris Est Creteil, CNRS, LISA, F-75013 Paris, France*

<sup>c</sup> *Institut Universitaire de France (IUF), F-75231*

\* Corresponding authors. Emails: [safa.khemissi@lisa.ipsl.fr](mailto:safa.khemissi@lisa.ipsl.fr) and [lam.nguyen@lisa.ipsl.fr](mailto:lam.nguyen@lisa.ipsl.fr)

**Table S-1:** Nuclear coordinates in the inertial principal axis system for 24DMFB calculated at the MP2/6-31G(d,p), MP2/6-311++G(d,p) and B3LYP-D3BJ/6-311++G(d,p) levels of theory. The atoms are numbered according to Figure 1.

|            | MP2/6-31G(d,p) |                |                | MP2/6-311++G(d,p) |                |                | B3LYP-D3BJ/6-311++G(d,p) |                |                |
|------------|----------------|----------------|----------------|-------------------|----------------|----------------|--------------------------|----------------|----------------|
|            | $a / \text{Å}$ | $b / \text{Å}$ | $c / \text{Å}$ | $a / \text{Å}$    | $b / \text{Å}$ | $c / \text{Å}$ | $a / \text{Å}$           | $b / \text{Å}$ | $c / \text{Å}$ |
| <b>C1</b>  | -1.091619      | -0.628612      | 0.000027       | -1.096500         | -0.631568      | -0.000035      | -1.091250                | -0.629009      | 0.000018       |
| <b>C2</b>  | -0.771234      | 0.729658       | 0.000016       | -0.777654         | 0.729623       | 0.000096       | -0.773706                | 0.727524       | -0.000005      |
| <b>C3</b>  | 0.586871       | 1.056668       | -0.000063      | 0.584872          | 1.056407       | -0.000217      | 0.583444                 | 1.051135       | -0.000051      |
| <b>C4</b>  | 1.593234       | 0.080372       | -0.000091      | 1.595743          | 0.080524       | 0.000068       | 1.589622                 | 0.078124       | -0.000066      |
| <b>C5</b>  | 1.213607       | -1.265283      | -0.000065      | 1.215617          | -1.268300      | -0.000191      | 1.210594                 | -1.264464      | -0.000061      |
| <b>C6</b>  | -0.134445      | -1.630962      | 0.000009       | -0.136321         | -1.634647      | 0.000080       | -0.136174                | -1.626682      | -0.000013      |
| <b>C7</b>  | -1.863904      | 1.760590       | -0.000004      | -1.865088         | 1.771408       | 0.000003       | -1.855623                | 1.772807       | -0.000009      |
| <b>C8</b>  | 3.044420       | 0.484241       | 0.000086       | 3.049769          | 0.487213       | 0.000115       | 3.043051                 | 0.482334       | 0.000075       |
| <b>F9</b>  | -2.408442      | -0.974162      | 0.000038       | -2.406196         | -0.981016      | 0.000059       | -2.406108                | -0.983031      | 0.000055       |
| <b>H10</b> | -2.501595      | 1.654757       | 0.877392       | -2.505279         | 1.668577       | 0.881431       | -2.499327                | 1.675536       | 0.878454       |
| <b>H11</b> | -2.501481      | 1.654846       | -0.877495      | -2.504889         | 1.668866       | -0.881743      | -2.499321                | 1.675537       | -0.878477      |
| <b>H12</b> | -1.442291      | 2.764004       | 0.000073       | -1.431384         | 2.774402       | 0.000267       | -1.422714                | 2.774134       | -0.000007      |
| <b>H13</b> | 3.287972       | 1.079436       | 0.880823       | 3.290835          | 1.083595       | 0.886104       | 3.287934                 | 1.081304       | 0.882321       |
| <b>H14</b> | 3.287098       | 1.083247       | -0.878295      | 3.289171          | 1.089412       | -0.882360      | 3.287233                 | 1.084557       | -0.880131      |
| <b>H15</b> | 3.693098       | -0.390488      | -0.002119      | 3.701484          | -0.390691      | -0.003356      | 3.696356                 | -0.392022      | -0.001769      |
| <b>H16</b> | 0.865638       | 2.105793       | -0.000096      | 0.863316          | 2.109806       | -0.000178      | 0.862004                 | 2.100719       | -0.000089      |
| <b>H17</b> | 1.973090       | -2.038030      | -0.000093      | 1.977625          | -2.044121      | -0.000146      | 1.969233                 | -2.038997      | -0.000105      |
| <b>H18</b> | -0.447126      | -2.666130      | -0.000018      | -0.447741         | -2.67466       | -0.000059      | -0.446170                | -2.664100      | -0.000021      |

**Table S-2:** Rotation constants of 24DMFB (in MHz) calculated at different levels of theory. The difference between the calculated and the experimental (in MHz) are given as  $\Delta A$ ,  $\Delta B$  and  $\Delta C$ .

| <b>Method/Basis set</b>     | <b><i>A</i></b> | <b><math>\Delta A</math></b> | <b><i>B</i></b> | <b><math>\Delta B</math></b> | <b><i>C</i></b> | <b><math>\Delta C</math></b> |
|-----------------------------|-----------------|------------------------------|-----------------|------------------------------|-----------------|------------------------------|
| B3LYP-D3/6-31G(d,p)         | 3007.7          | 9.7                          | 1276.9          | -6.9                         | 906.4           | -2.7                         |
| B3LYP-D3/6-31+G(d,p)        | 2987.5          | -10.5                        | 1275.2          | -8.6                         | 903.7           | -5.4                         |
| B3LYP-D3/6-31++G(d,p)       | 2987.4          | -10.6                        | 1275.2          | -8.6                         | 903.7           | -5.4                         |
| B3LYP-D3/6-311G(d,p)        | 3011.8          | 13.8                         | 1280.1          | -3.7                         | 908.4           | -0.7                         |
| B3LYP-D3/6-311+G(d,p)       | 3001.9          | 3.9                          | 1280.3          | -3.5                         | 907.6           | -1.5                         |
| B3LYP-D3/6-311++G(d,p)      | 3001.9          | 3.9                          | 1280.3          | -3.5                         | 907.6           | -1.5                         |
| B3LYP-D3/6-311G(2d,2p)      | 3024.1          | 26.1                         | 1284.5          | 0.7                          | 911.7           | 2.6                          |
| B3LYP-D3/6-311+G(2d,2p)     | 3013.4          | 15.4                         | 1284.4          | 0.6                          | 910.6           | 1.5                          |
| B3LYP-D3/6-311++G(2d,2p)    | 3013.4          | 15.4                         | 1284.4          | 0.6                          | 910.6           | 1.5                          |
| B3LYP-D3/6-311G(df,pd)      | 3022.7          | 24.7                         | 1284.7          | 0.9                          | 911.7           | 2.6                          |
| B3LYP-D3/6-311+G(df,pd)     | 3012.6          | 14.6                         | 1284.9          | 1.2                          | 910.9           | 1.8                          |
| B3LYP-D3/6-311++G(df,pd)    | 3012.6          | 14.6                         | 1284.9          | 1.2                          | 910.9           | 1.8                          |
| B3LYP-D3/6-311G(2df,2pd)    | 3029.6          | 31.6                         | 1286.4          | 2.6                          | 913.1           | 4.0                          |
| B3LYP-D3/6-311+G(2df,2pd)   | 3018.4          | 20.4                         | 1286.3          | 2.5                          | 912.0           | 2.9                          |
| B3LYP-D3/6-311++G(2df,2pd)  | 3018.3          | 20.3                         | 1286.3          | 2.5                          | 912.0           | 2.9                          |
| B3LYP-D3/6-311G(3df,3pd)    | 3026.8          | 28.8                         | 1287.3          | 3.5                          | 913.3           | 4.2                          |
| B3LYP-D3/6-311+G(3df,3pd)   | 3017.7          | 19.7                         | 1287.1          | 3.3                          | 912.4           | 3.3                          |
| B3LYP-D3/6-311++G(3df,3pd)  | 3017.8          | 19.8                         | 1287.0          | 3.3                          | 912.4           | 3.3                          |
| B3LYP-D3/cc-pVDZ            | 3000.0          | 2.1                          | 1273.1          | -10.6                        | 903.9           | -5.2                         |
| B3LYP-D3/aug-cc-pVDZ        | 2984.5          | -13.5                        | 1274.1          | -9.7                         | 903.0           | -6.1                         |
| B3LYP-D3/cc-pVTZ            | 3020.8          | 22.8                         | 1286.3          | 2.5                          | 912.3           | 3.2                          |
| B3LYP-D3/aug-cc-pVTZ        | 3016.5          | 18.5                         | 1286.4          | 2.6                          | 911.9           | 2.8                          |
|                             |                 |                              |                 |                              |                 |                              |
| B3LYP-D3BJ/6-31G(d,p)       | 3007.7          | 9.7                          | 1278.9          | -4.9                         | 907.4           | -1.7                         |
| B3LYP-D3BJ/6-31+G(d,p)      | 2987.4          | -10.5                        | 1277.2          | -6.6                         | 904.7           | -4.3                         |
| B3LYP-D3BJ/6-31++G(d,p)     | 2987.4          | -10.6                        | 1277.3          | -6.5                         | 904.7           | -4.3                         |
| B3LYP-D3BJ/6-311G(d,p)      | 3011.6          | 13.7                         | 1282.2          | -1.6                         | 909.4           | 0.3                          |
| B3LYP-D3BJ/6-311+G(d,p)     | 3001.7          | 3.8                          | 1282.4          | -1.4                         | 908.6           | -0.5                         |
| B3LYP-D3BJ/6-311++G(d,p)    | 3001.7          | 3.7                          | 1282.4          | -1.4                         | 908.6           | -0.5                         |
| B3LYP-D3BJ/6-311G(2d,2p)    | 3023.9          | 25.9                         | 1286.6          | 2.8                          | 912.7           | 3.6                          |
| B3LYP-D3BJ/6-311+G(2d,2p)   | 3013.2          | 15.2                         | 1286.5          | 2.7                          | 911.6           | 2.5                          |
| B3LYP-D3BJ/6-311++G(2d,2p)  | 3013.1          | 15.1                         | 1286.5          | 2.7                          | 911.6           | 2.5                          |
| B3LYP-D3BJ/6-311G(df,pd)    | 3022.5          | 24.5                         | 1286.8          | 3.0                          | 912.7           | 3.6                          |
| B3LYP-D3BJ/6-311+G(df,pd)   | 3012.3          | 14.3                         | 1287.1          | 3.3                          | 911.9           | 2.8                          |
| B3LYP-D3BJ/6-311++G(df,pd)  | 3012.3          | 14.3                         | 1287.1          | 3.3                          | 911.9           | 2.8                          |
| B3LYP-D3BJ/6-311G(2df,2pd)  | 3029.4          | 31.5                         | 1288.5          | 4.7                          | 914.1           | 5.1                          |
| B3LYP-D3BJ/6-311+G(2df,2pd) | 3018.1          | 20.1                         | 1288.4          | 4.6                          | 913.1           | 4.0                          |

|                              |        |       |        |       |       |       |
|------------------------------|--------|-------|--------|-------|-------|-------|
| B3LYP-D3BJ/6-311++G(2df,2pd) | 3018.0 | 20.0  | 1288.4 | 4.6   | 913.1 | 4.0   |
| B3LYP-D3BJ/6-311G(3df,3pd)   | 3026.6 | 28.6  | 1289.4 | 5.6   | 914.3 | 5.2   |
| B3LYP-D3BJ/6-311+G(3df,3pd)  | 3017.8 | 19.8  | 1289.1 | 5.3   | 913.4 | 4.3   |
| B3LYP-D3BJ/6-311++G(3df,3pd) | 3017.5 | 19.5  | 1289.1 | 5.3   | 913.4 | 4.3   |
| B3LYP-D3BJ/cc-pVDZ           | 3000.1 | 2.1   | 1275.2 | -8.6  | 905.0 | -4.1  |
| B3LYP-D3BJ/aug-cc-pVDZ       | 2984.5 | -13.5 | 1276.2 | -7.6  | 904.0 | -5.1  |
| B3LYP-D3BJ/cc-pVTZ           | 3020.6 | 22.6  | 1288.4 | 4.6   | 913.3 | 4.2   |
| B3LYP-D3BJ/aug-cc-pVTZ       | 3016.2 | 18.2  | 1288.4 | 4.6   | 912.9 | 3.8   |
|                              |        |       |        |       |       |       |
| CAM-B3LYP-D3BJ/6-311G(d,p)   | 3037.1 | 39.1  | 1291.1 | 7.3   | 916.2 | 7.1   |
| CAM-B3LYP-D3BJ/6-311+G(d,p)  | 3027.2 | 29.2  | 1291.3 | 7.6   | 915.4 | 6.3   |
| CAM-B3LYP-D3BJ/6-311++G(d,p) | 3027.2 | 29.2  | 1291.3 | 7.5   | 915.4 | 6.3   |
| CAM-B3LYP-D3BJ/cc-pVDZ       | 3025.5 | 27.5  | 1284.0 | 0.2   | 911.7 | 2.6   |
| CAM-B3LYP-D3BJ/aug-cc-pVDZ   | 3008.9 | 11.0  | 1285.0 | 1.2   | 910.7 | 1.6   |
| CAM-B3LYP-D3BJ/cc-pVTZ       | 3045.4 | 47.4  | 1297.4 | 13.6  | 920.1 | 11.0  |
| CAM-B3LYP-D3BJ/aug-cc-pVTZ   | 3041.1 | 43.1  | 1297.4 | 13.6  | 919.7 | 10.6  |
| CCSD/cc-pVDZ                 | 2975.0 | -22.9 | 1264.8 | -19.0 | 897.6 | -11.5 |
|                              |        |       |        |       |       |       |
| M06-2X/6-31G(d,p)            | 3029.7 | 31.7  | 1285.3 | 1.5   | 912.6 | 3.5   |
| M06-2X/6-31+G(d,p)           | 3013.6 | 15.6  | 1283.9 | 0.1   | 910.5 | 1.4   |
| M06-2X/6-31++G(d,p)          | 3013.5 | 15.5  | 1283.9 | 0.1   | 910.5 | 1.4   |
| M06-2X/6-311G(d,p)           | 3033.3 | 35.3  | 1287.8 | 4.1   | 914.2 | 5.1   |
| M06-2X/6-311+G(d,p)          | 3025.9 | 27.9  | 1288.1 | 4.3   | 913.7 | 4.6   |
| M06-2X/6-311++G(d,p)         | 3025.9 | 27.9  | 1288.1 | 4.3   | 913.7 | 4.6   |
| M06-2X/6-311G(2d,2p)         | 3045.3 | 47.4  | 1291.7 | 7.9   | 917.2 | 8.1   |
| M06-2X/6-311+G(2d,2p)        | 3036.9 | 38.9  | 1291.6 | 7.8   | 916.4 | 7.3   |
| M06-2X/6-311++G(2d,2p)       | 3036.8 | 38.8  | 1291.6 | 7.8   | 916.4 | 7.3   |
| M06-2X/6-311G(df,pd)         | 3042.4 | 44.4  | 1291.4 | 7.6   | 916.8 | 7.7   |
| M06-2X/6-311+G(df,pd)        | 3034.4 | 36.5  | 1291.8 | 8.0   | 916.3 | 7.2   |
| M06-2X/6-311++G(df,pd)       | 3034.5 | 36.5  | 1291.8 | 8.0   | 916.3 | 7.2   |
| M06-2X/6-311G(2df,2pd)       | 3050.2 | 52.2  | 1293.1 | 9.3   | 918.3 | 9.3   |
| M06-2X/6-311+G(2df,2pd)      | 3040.9 | 42.9  | 1293.2 | 9.4   | 917.5 | 8.5   |
| M06-2X/6-311++G(2df,2pd)     | 3040.8 | 42.8  | 1293.2 | 9.4   | 917.5 | 8.5   |
| M06-2X/6-311G(3df,3pd)       | 3047.7 | 49.7  | 1293.7 | 9.9   | 918.4 | 9.3   |
| M06-2X/6-311+G(3df,3pd)      | 3040.5 | 42.6  | 1293.5 | 9.8   | 917.7 | 8.6   |
| M06-2X/6-311++G(3df,3pd)     | 3040.6 | 42.7  | 1293.5 | 9.7   | 917.7 | 8.6   |
| M06-2X/cc-pVDZ               | 3024.6 | 26.6  | 1282.3 | -1.5  | 910.8 | 1.7   |
| M06-2X/aug-cc-pVDZ           | 3011.2 | 13.3  | 1283.3 | -0.5  | 910.0 | 0.9   |
| M06-2X/cc-pVTZ               | 3041.4 | 43.4  | 1293.2 | 9.5   | 917.6 | 8.5   |
| M06-2X/aug-cc-pVTZ           | 3038.6 | 40.6  | 1293.3 | 9.5   | 917.4 | 8.3   |

|                        |        |       |        |       |       |       |
|------------------------|--------|-------|--------|-------|-------|-------|
| MN15/6-31G(d,p)        | 3024.6 | 26.6  | 1281.4 | -2.4  | 910.2 | 1.1   |
| MN15/6-31+G(d,p)       | 3005.6 | 7.7   | 1279.9 | -3.9  | 907.8 | -1.3  |
| MN15/6-31++G(d,p)      | 3005.5 | 7.5   | 1279.9 | -3.9  | 907.8 | -1.3  |
| MN15/6-311G(d,p)       | 3032.0 | 34.0  | 1285.8 | 2.0   | 913.1 | 4.0   |
| MN15/6-311+G(d,p)      | 3024.3 | 26.3  | 1286.0 | 2.2   | 912.5 | 3.4   |
| MN15/6-311++G(d,p)     | 3024.3 | 26.3  | 1286.0 | 2.2   | 912.5 | 3.4   |
| MN15/6-311G(2d,2p)     | 3043.5 | 45.6  | 1289.3 | 5.5   | 915.8 | 6.8   |
| MN15/6-311+G(2d,2p)    | 3034.4 | 36.4  | 1289.3 | 5.5   | 915.0 | 5.9   |
| MN15/6-311++G(2d,2p)   | 3034.4 | 36.4  | 1289.3 | 5.5   | 915.0 | 5.9   |
| MN15/6-311G(df,pd)     | 3044.5 | 46.5  | 1290.8 | 7.0   | 916.7 | 7.6   |
| MN15/6-311+G(df,pd)    | 3035.9 | 37.9  | 1291.1 | 7.3   | 916.1 | 7.0   |
| MN15/6-311++G(df,pd)   | 3035.8 | 37.9  | 1291.1 | 7.3   | 916.0 | 7.0   |
| MN15/6-311G(2df,2pd)   | 3049.7 | 51.7  | 1291.2 | 7.4   | 917.3 | 8.2   |
| MN15/6-311+G(2df,2pd)  | 3039.6 | 41.7  | 1291.3 | 7.5   | 916.5 | 7.4   |
| MN15/6-311++G(2df,2pd) | 3039.6 | 41.6  | 1291.4 | 7.6   | 916.5 | 7.4   |
| MN15/6-311G(3df,3pd)   | 3049.6 | 51.6  | 1292.9 | 9.1   | 918.2 | 9.1   |
| MN15/6-311+G(3df,3pd)  | 3041.5 | 43.5  | 1292.7 | 8.9   | 917.3 | 8.3   |
| MN15/6-311++G(3df,3pd) | 3041.8 | 43.8  | 1292.7 | 8.9   | 917.4 | 8.3   |
| MN15/cc-pVDZ           | 3021.1 | 23.1  | 1278.3 | -5.5  | 908.4 | -0.7  |
| MN15/aug-cc-pVDZ       | 3006.0 | 8.0   | 1280.3 | -3.5  | 908.0 | -1.1  |
| MN15/cc-pVTZ           | 3041.1 | 43.1  | 1292.3 | 8.5   | 917.1 | 8.0   |
| MN15/aug-cc-pVTZ       | 3039.5 | 41.6  | 1292.7 | 8.9   | 917.2 | 8.1   |
|                        |        |       |        |       |       |       |
| PBE0/6-31G(d,p)        | 2978.6 | -19.4 | 1266.9 | -16.9 | 898.9 | -10.2 |
| PBE0/6-31+G(d,p)       | 2957.1 | -40.9 | 1265.5 | -18.3 | 896.2 | -12.9 |
| PBE0/6-31++G(d,p)      | 2957.0 | -41.0 | 1265.5 | -18.3 | 896.2 | -12.9 |
| PBE0/6-311G(d,p)       | 2983.0 | -14.9 | 1270.8 | -13.0 | 901.2 | -7.9  |
| PBE0/6-311+G(d,p)      | 2972.2 | -25.8 | 1270.9 | -12.9 | 900.2 | -8.8  |
| PBE0/6-311++G(d,p)     | 2972.2 | -25.8 | 1270.8 | -12.9 | 900.2 | -8.9  |
| PBE0/6-311G(2d,2p)     | 2993.9 | -4.1  | 1274.4 | -9.4  | 903.9 | -5.2  |
| PBE0/6-311+G(2d,2p)    | 2981.8 | -16.2 | 1274.2 | -9.5  | 902.8 | -6.3  |
| PBE0/6-311++G(2d,2p)   | 2981.7 | -16.2 | 1274.3 | -9.5  | 902.8 | -6.3  |
| PBE0/6-311G(df,pd)     | 2993.3 | -4.6  | 1274.7 | -9.0  | 904.1 | -5.0  |
| PBE0/6-311+G(df,pd)    | 2981.4 | -16.5 | 1275.2 | -8.6  | 903.3 | -5.8  |
| PBE0/6-311++G(df,pd)   | 2981.5 | -16.5 | 1275.2 | -8.6  | 903.2 | -5.8  |
| PBE0/6-311G(2df,2pd)   | 2999.7 | 1.7   | 1276.1 | -7.7  | 905.3 | -3.8  |
| PBE0/6-311+G(2df,2pd)  | 2986.3 | -11.7 | 1276.2 | -7.6  | 904.2 | -4.9  |
| PBE0/6-311++G(2df,2pd) | 2986.2 | -11.8 | 1276.2 | -7.6  | 904.2 | -4.9  |
| PBE0/6-311G(3df,3pd)   | 2996.6 | -1.3  | 1277.3 | -6.5  | 905.6 | -3.5  |
| PBE0/6-311+G(3df,3pd)  | 2986.3 | -11.7 | 1277.0 | -6.8  | 904.6 | -4.5  |
| PBE0/6-311++G(3df,3pd) | 2986.4 | -11.6 | 1277.0 | -6.8  | 904.6 | -4.5  |

|                                 |        |       |        |       |       |       |
|---------------------------------|--------|-------|--------|-------|-------|-------|
| PBE0/cc-pVDZ                    | 2973.3 | -24.6 | 1264.0 | -19.8 | 897.0 | -12.1 |
| PBE0/aug-cc-pVDZ                | 2955.2 | -42.8 | 1265.0 | -18.8 | 895.8 | -13.3 |
| PBE0/cc-pVTZ                    | 2990.0 | -8.0  | 1276.3 | -7.5  | 904.5 | -4.6  |
| PBE0/aug-cc-pVTZ                | 2984.8 | -13.2 | 1276.2 | -7.6  | 904.0 | -5.1  |
|                                 |        |       |        |       |       |       |
| PBE0-D3/6-31G(d,p)              | 2980.8 | -17.1 | 1267.0 | -16.8 | 899.1 | -10.0 |
| PBE0-D3/6-31+G(d,p)             | 2959.5 | -38.4 | 1265.5 | -18.3 | 896.4 | -12.7 |
| PBE0-D3/6-31++G(d,p)            | 2959.5 | -38.5 | 1265.5 | -18.2 | 896.4 | -12.7 |
| PBE0-D3/6-311G(d,p)             | 2985.3 | -12.6 | 1270.8 | -13.0 | 901.4 | -7.7  |
| PBE0-D3/6-311+G(d,p)            | 2974.6 | -23.3 | 1270.9 | -12.9 | 900.5 | -8.6  |
| PBE0-D3/6-311++G(d,p)           | 2974.6 | -23.4 | 1270.9 | -12.9 | 900.5 | -8.6  |
| PBE0-D3/6-311G(2d,2p)           | 2996.1 | -1.9  | 1274.4 | -9.4  | 904.2 | -4.9  |
| PBE0-D3/6-311+G(2d,2p)          | 2984.2 | -13.7 | 1274.3 | -9.5  | 903.0 | -6.1  |
| PBE0-D3/6-311++G(2d,2p)         | 2984.2 | -13.8 | 1274.3 | -9.5  | 903.0 | -6.1  |
| PBE0-D3/6-311G(df,pd)           | 2995.6 | -2.4  | 1274.8 | -9.0  | 904.3 | -4.7  |
| PBE0-D3/6-311+G(df,pd)          | 2983.9 | -14.1 | 1275.2 | -8.5  | 903.5 | -5.6  |
| PBE0-D3/6-311++G(df,pd)         | 2983.9 | -14.1 | 1275.2 | -8.6  | 903.5 | -5.6  |
| PBE0-D3/6-311G(2df,2pd)         | 3002.0 | 4.0   | 1276.1 | -7.7  | 905.5 | -3.6  |
| PBE0-D3/6-311+G(2df,2pd)        | 2988.8 | -9.2  | 1276.2 | -7.5  | 904.4 | -4.7  |
| PBE0-D3/6-311++G(2df,2pd)       | 2988.6 | -9.3  | 1276.3 | -7.5  | 904.4 | -4.7  |
| PBE0-D3/6-311G(3df,3pd)         | 2998.9 | 0.9   | 1277.3 | -6.5  | 905.9 | -3.2  |
| PBE0-D3/6-311+G(3df,3pd)        | 2988.7 | -9.2  | 1277.0 | -6.8  | 904.8 | -4.3  |
| PBE0-D3/6-311++G(3df,3pd)       | 2988.8 | -9.1  | 1277.0 | -6.8  | 904.8 | -4.3  |
| PBE0-D3/cc-pVDZ                 | 2975.5 | -22.5 | 1264.1 | -19.7 | 897.2 | -11.8 |
| PBE0-D3/aug-cc-pVDZ             | 2957.7 | -40.3 | 1265.0 | -18.8 | 896.0 | -13.0 |
| PBE0-D3/cc-pVTZ                 | 2992.3 | -5.7  | 1276.3 | -7.5  | 904.8 | -4.3  |
| PBE0-D3/aug-cc-pVTZ             | 2987.2 | -10.8 | 1276.2 | -7.6  | 904.2 | -4.9  |
|                                 |        |       |        |       |       |       |
| $\omega$ B97X-D/6-31G(d,p)      | 3015.9 | 17.9  | 1285.8 | 2.0   | 911.6 | 2.6   |
| $\omega$ B97X-D/6-31+G(d,p)     | 3000.9 | 2.9   | 1284.4 | 0.7   | 909.6 | 0.5   |
| $\omega$ B97X-D/6-31++G(d,p)    | 3000.9 | 2.9   | 1284.5 | 0.7   | 909.6 | 0.5   |
| $\omega$ B97XD/6-311G(d,p)      | 3013.9 | 16.0  | 1289.3 | 5.5   | 913.2 | 4.1   |
| $\omega$ B97XD/6-311+G(d,p)     | 3013.9 | 16.0  | 1289.3 | 5.5   | 913.2 | 4.1   |
| $\omega$ B97XD/6-311++G(d,p)    | 3021.3 | 23.3  | 1289.1 | 5.3   | 913.8 | 4.7   |
| $\omega$ B97XD/6-311G(2d,2p)    | 3032.6 | 34.7  | 1293.1 | 9.3   | 916.8 | 7.7   |
| $\omega$ B97X-D/6-311+G(2d,2p)  | 3024.4 | 26.5  | 1293.0 | 9.2   | 916.0 | 6.9   |
| $\omega$ B97X-D/6-311++G(2d,2p) | 3024.4 | 26.4  | 1293.0 | 9.2   | 916.0 | 6.9   |
| $\omega$ B97X-D/6-311G(df,pd)   | 3030.9 | 32.9  | 1293.3 | 9.5   | 916.7 | 7.6   |
| $\omega$ B97X-D/6-311+G(df,pd)  | 3022.9 | 24.9  | 1293.6 | 9.8   | 916.2 | 7.1   |
| $\omega$ B97X-D/6-311++G(df,pd) | 3023.0 | 25.0  | 1293.6 | 9.8   | 916.2 | 7.1   |
| $\omega$ B97X-D/6-311G(2df,2pd) | 3037.8 | 39.8  | 1294.9 | 11.1  | 918.1 | 9.0   |

|                                   |               |       |               |       |              |       |
|-----------------------------------|---------------|-------|---------------|-------|--------------|-------|
| $\omega$ B97X-D/6-311+G(2df,2pd)  | 3028.6        | 30.6  | 1294.9        | 11.1  | 917.3        | 8.2   |
| $\omega$ B97X-D/6-311++G(2df,2pd) | 3028.5        | 30.6  | 1294.9        | 11.1  | 917.3        | 8.2   |
| $\omega$ B97X-D/6-311G(3df,3pd)   | 3035.3        | 37.3  | 1295.7        | 12.0  | 918.3        | 9.3   |
| $\omega$ B97X-D/6-311+G(3df,3pd)  | 3028.4        | 30.4  | 1295.6        | 11.8  | 917.6        | 8.5   |
| $\omega$ B97X-D/6-311++G(3df,3pd) | 3028.4        | 30.5  | 1295.5        | 11.8  | 917.6        | 8.5   |
| $\omega$ B97X-D/cc-pVDZ           | 3008.8        | 10.8  | 1281.9        | -1.9  | 909.2        | 0.1   |
| $\omega$ B97X-D/aug-cc-pVDZ       | 2996.1        | -1.9  | 1283.0        | -0.8  | 908.5        | -0.6  |
| $\omega$ B97X-D/cc-pVTZ           | 3030.5        | 32.5  | 1295.2        | 11.4  | 917.6        | 8.5   |
| $\omega$ B97X-D/aug-cc-pVTZ       | 3027.8        | 29.9  | 1295.3        | 11.6  | 917.5        | 8.4   |
|                                   |               |       |               |       |              |       |
| MP2/6-31G(d,p)                    | 3013.0        | 15.0  | 1279.2        | -4.6  | 908.0        | -1.1  |
| MP2/6-31+G(d,p)                   | 2991.5        | -6.5  | 1276.6        | -7.2  | 904.8        | -4.3  |
| MP2/6-31++G(d,p)                  | 2991.8        | -6.2  | 1276.2        | -7.6  | 904.6        | -4.5  |
| MP2/6-311G(d,p)                   | 2999.7        | 1.7   | 1277.3        | -6.5  | 905.9        | -3.2  |
| MP2/6-311+G(d,p)                  | 2989.8        | -8.2  | 1276.8        | -6.9  | 904.8        | -4.3  |
| MP2/6-311++G(d,p)                 | 2989.7        | -8.3  | 1276.7        | -7.1  | 904.7        | -4.4  |
| MP2/6-311G(2d,2p)                 | 3021.0        | 23.1  | 1282.2        | -1.5  | 910.2        | 1.1   |
| MP2/6-311+G(2d,2p)                | 3009.6        | 11.7  | 1282.1        | -1.7  | 909.1        | 0.0   |
| MP2/6-311++G(2d,2p)               | 3009.6        | 11.6  | 1282.1        | -1.7  | 909.1        | 0.0   |
| MP2/6-311G(df,pd)                 | 3021.7        | 23.7  | 1286.8        | 3.0   | 912.7        | 3.6   |
| MP2/6-311+G(df,pd)                | 3010.8        | 12.8  | 1286.3        | 2.5   | 911.4        | 2.3   |
| MP2/6-311++G(df,pd)               | 3010.7        | 12.7  | 1286.2        | 2.5   | 911.4        | 2.3   |
| MP2/6-311G(2df,2pd)               | 3037.3        | 39.3  | 1288.8        | 5.0   | 915.0        | 5.9   |
| MP2/6-311+G(2df,2pd)              | 3025.0        | 27.0  | 1288.4        | 4.6   | 913.7        | 4.6   |
| MP2/6-311++G(2df,2pd)             | 3024.9        | 26.9  | 1288.4        | 4.6   | 913.7        | 4.6   |
| MP2/6-311G(3df,3pd)               | 3029.1        | 31.1  | 1288.0        | 4.2   | 913.9        | 4.8   |
| MP2/6-311+G(3df,3pd)              | 3019.9        | 21.9  | 1287.4        | 3.6   | 912.7        | 3.6   |
| MP2/6-311++G(3df,3pd)             | 3020.1        | 22.1  | 1287.4        | 3.6   | 912.7        | 3.7   |
| MP2/cc-pVDZ                       | 2980.0        | -18.0 | 1265.8        | -18.0 | 898.5        | -10.6 |
| MP2/aug-cc-pVDZ                   | 2959.3        | -38.7 | 1263.6        | -20.2 | 895.5        | -13.6 |
| MP2/cc-pVTZ                       | 3021.0        | 23.1  | 1287.0        | 3.3   | 912.7        | 3.6   |
| MP2/aug-cc-pVTZ                   | 3015.4        | 17.4  | 1286.5        | 2.7   | 911.9        | 2.8   |
| <b>Experimental</b>               | <b>2998.0</b> |       | <b>1283.8</b> |       | <b>909.1</b> |       |

**Table S-3.** Coefficients of Fourier expansion for the one-dimensional potential energy curves of 24DMFB given in Figures 2 and 3 calculated at the B3LYP-D3BJ/6-311++G(d,p), MP2/6-311++G(d,p) and MP2/6-311G(d,p) levels of theory. The potential is expanded as  $V(\alpha) = \sum_{i=0}^n a_i f_i$ .

| <b>B3LYP-D3BJ/6-311++G(d,p)</b> |                    |                         |                    |                         |
|---------------------------------|--------------------|-------------------------|--------------------|-------------------------|
|                                 | <b><i>o</i>-Me</b> |                         | <b><i>p</i>-Me</b> |                         |
| $f_i$                           | $a_i$ / Hartree    | $a_i$ /cm <sup>-1</sup> | $a_i$ / Hartree    | $a_i$ /cm <sup>-1</sup> |
| 1                               | -410.2653163       |                         | -410.2657503       |                         |
| cos(3 $\alpha$ )                | -0.000463388       | -101.70                 | -0.000027632       | -6.06                   |
| cos(6 $\alpha$ )                | 0.000008680        | 1.91                    | 0.000010146        | 2.23                    |

  

| <b>MP2/6-311++G(d,p)</b> |                    |                         |                    |                         |
|--------------------------|--------------------|-------------------------|--------------------|-------------------------|
|                          | <b><i>o</i>-Me</b> |                         | <b><i>p</i>-Me</b> |                         |
| $f_i$                    | $a_i$ / Hartree    | $a_i$ /cm <sup>-1</sup> | $a_i$ / Hartree    | $a_i$ /cm <sup>-1</sup> |
| 1                        | -409.0633023       |                         | -409.0637305       |                         |
| cos(3 $\alpha$ )         | -0.000536196       | -117.68                 | -0.000017509       | -3.84                   |
| cos(6 $\alpha$ )         | 0.000063160        | 13.86                   | 0.000063209        | 13.87                   |
| cos(9 $\alpha$ )         | –                  | –                       | 0.000002456        | 0.54                    |

  

| <b>MP2/6-31G(d,p)</b> |                    |                         |                    |                         |
|-----------------------|--------------------|-------------------------|--------------------|-------------------------|
|                       | <b><i>o</i>-Me</b> |                         | <b><i>p</i>-Me</b> |                         |
| $f_i$                 | $a_i$ / Hartree    | $a_i$ /cm <sup>-1</sup> | $a_i$ / Hartree    | $a_i$ /cm <sup>-1</sup> |
| 1                     | -408.8909866       |                         | -408.8913773       |                         |
| cos(3 $\alpha$ )      | -0.000461471       | -101.28                 | -0.000019337       | -4.24                   |
| cos(6 $\alpha$ )      | 0.000036636        | 8.04                    | 0.000051809        | 11.37                   |
| cos(9 $\alpha$ )      | –                  | –                       | -0.000003114       | -0.68                   |



**Table S-4.** Coefficients of Fourier expansion for the two-dimensional potential energy surface of 24DMFB given in Figure 4 calculated at the B3LYP-D3BJ/6-311++G(d,p), MP2/6-311++G(d,p) and MP2/6-311G(d,p) levels of theory. The potential is expanded as  $V(\alpha) = \sum_{i=0}^n a_i f_i$ .

| i | $f_i$                                | <b>B3LYP-D3BJ/<br/>6-311++G(d,p)</b> |                         | <b>MP2/<br/>6-311++G(d,p)</b> |                         | <b>MP2/<br/>6-31G(d,p)</b> |                         |
|---|--------------------------------------|--------------------------------------|-------------------------|-------------------------------|-------------------------|----------------------------|-------------------------|
|   |                                      | $a_i$ / Hartree                      | $a_i$ /cm <sup>-1</sup> | $a_i$ / Hartree               | $a_i$ /cm <sup>-1</sup> | $a_i$ / Hartree            | $a_i$ /cm <sup>-1</sup> |
| 0 | 1                                    | -410.2652946                         |                         | -409.0632178                  |                         | -408.8909247               |                         |
| 1 | cos(3 $\alpha_1$ )                   | 0.000462578                          | 101.52                  | 0.000543278                   | 119.24                  | 0.000471359                | 103.45                  |
| 2 | cos(3 $\alpha_2$ )                   | 0.000001395                          | 0.31                    | 0.000003791                   | 0.83                    | 0.000001457                | 0.32                    |
| 3 | cos(6 $\alpha_1$ )                   | 0.000006685                          | 1.47                    | 0.000033305                   | 7.31                    | 0.000020280                | 4.45                    |
| 4 | cos(6 $\alpha_2$ )                   | 0.000010325                          | 2.27                    | 0.000061306                   | 13.46                   | 0.000050444                | 11.07                   |
| 5 | cos(3 $\alpha_1$ )cos(3 $\alpha_2$ ) | -0.000027476                         | -6.03                   | -0.000018683                  | -4.10                   | -0.000023375               | -5.13                   |
| 6 | sin(3 $\alpha_1$ )sin(3 $\alpha_2$ ) | -                                    | -                       | 0.000031097                   | 6.83                    | -0.000001988               | -0.44                   |

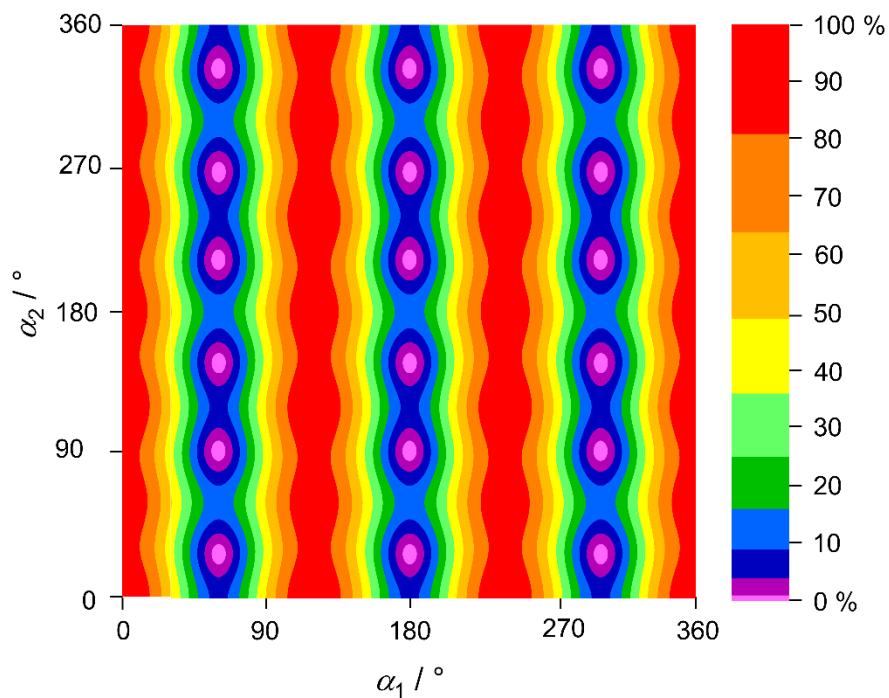

**Figure S-1.** A two-dimensional potential energy surface of 24DMFB in dependence on the dihedral angles  $\alpha_1 = \angle(\text{C}_3, \text{C}_2, \text{C}_7, \text{H}_{12})$  and  $\alpha_2 = \angle(\text{C}_5, \text{C}_4, \text{C}_8, \text{H}_{15})$  calculated at the MP2/6-31G(d,p) level of theory. The dihedral angles  $\alpha_1$  and  $\alpha_2$  were varied in steps of  $10^\circ$  while all other geometry parameters were optimized. The numbers in the color code indicate the energy (in percent) relative to the energetic minimum (0%) and maximum (100%) with  $E_{\min} = -408.891426$ , and  $E_{\max} = -408.890357$  Hartree (100%).

**Table S-5.** Fitted frequencies ( $\nu_{\text{obs}}$ ) of 24DMFB. The  $\nu_{\text{obs}} - \nu_{\text{calc}}$  residuals are obtained with the *XIAM<sub>mod</sub>* and *BELGI-C<sub>s</sub>-2Tops* programs.

| $J'$        | $K_a'$ | $K_c'$ | $J$         | $K_a$ | $K_c$ | Species | $\nu_{\text{obs}}$<br>MHz | $\nu_{\text{obs}} - \nu_{\text{calc}}$<br><i>XIAM</i> / kHz | $\nu_{\text{obs}} - \nu_{\text{calc}}$<br><i>BELGI</i> / kHz |
|-------------|--------|--------|-------------|-------|-------|---------|---------------------------|-------------------------------------------------------------|--------------------------------------------------------------|
| Upper level |        |        | Lower level |       |       |         |                           |                                                             |                                                              |
| 2           | 0      | 2      | 1           | 0     | 1     | (00)    | 4333.4249                 | 24.9                                                        | 1                                                            |
| 2           | 1      | 1      | 1           | 1     | 0     | (00)    | 4762.4717                 | 34.1                                                        | 0                                                            |
| 2           | 1      | 2      | 1           | 0     | 1     | (00)    | 5779.1966                 | 108.4                                                       | 1                                                            |
| 2           | 1      | 2      | 1           | 1     | 1     | (00)    | 4011.7336                 | 9.3                                                         | -5                                                           |
| 2           | 2      | 0      | 1           | 1     | 1     | (00)    | 10493.8848                | 300.6                                                       | 2                                                            |
| 2           | 2      | 1      | 1           | 1     | 0     | (00)    | 10064.8360                | 289.5                                                       | 1                                                            |
| 3           | 0      | 3      | 2           | 0     | 2     | (00)    | 6372.8336                 | 34.3                                                        | 1                                                            |
| 3           | 1      | 2      | 2           | 1     | 1     | (00)    | 7107.3961                 | 50.6                                                        | 1                                                            |
| 3           | 1      | 3      | 2           | 0     | 2     | (00)    | 7431.9246                 | 103                                                         | 0                                                            |
| 3           | 1      | 3      | 2           | 1     | 2     | (00)    | 5986.1543                 | 20.9                                                        | 1                                                            |
| 3           | 2      | 1      | 2           | 1     | 2     | (00)    | 13270.6252                | 322.3                                                       | 2                                                            |
| 3           | 2      | 1      | 2           | 2     | 0     | (00)    | 6788.4779                 | 35.0                                                        | 0                                                            |
| 3           | 2      | 2      | 2           | 1     | 1     | (00)    | 11883.0184                | 288.7                                                       | 1                                                            |
| 3           | 2      | 2      | 2           | 2     | 1     | (00)    | 6580.6465                 | 25.8                                                        | -8                                                           |
| 3           | 3      | 0      | 3           | 2     | 1     | (00)    | 9550.4607                 | 355.6                                                       | 1                                                            |
| 3           | 3      | 1      | 3           | 2     | 2     | (00)    | 9807.1074                 | 356.8                                                       | 1                                                            |
| 4           | 0      | 4      | 3           | 0     | 3     | (00)    | 8292.6417                 | 41.1                                                        | 1                                                            |
| 4           | 1      | 3      | 3           | 1     | 2     | (00)    | 9401.8697                 | 64.1                                                        | 2                                                            |
| 4           | 1      | 4      | 3           | 0     | 3     | (00)    | 8988.2414                 | 93.0                                                        | 0                                                            |
| 4           | 1      | 4      | 3           | 1     | 3     | (00)    | 7929.1510                 | 24.8                                                        | 1                                                            |
| 4           | 2      | 2      | 3           | 1     | 3     | (00)    | 16497.9156                | 350.6                                                       | 4                                                            |
| 4           | 2      | 2      | 3           | 2     | 1     | (00)    | 9213.4437                 | 48.2                                                        | 3                                                            |
| 4           | 2      | 3      | 3           | 1     | 2     | (00)    | 13507.8615                | 279.3                                                       | -1                                                           |
| 4           | 2      | 3      | 3           | 2     | 2     | (00)    | 8732.2412                 | 43.2                                                        | 1                                                            |
| 4           | 3      | 1      | 4           | 2     | 2     | (00)    | 9234.2848                 | 346.5                                                       | -3                                                           |
| 4           | 3      | 2      | 3           | 3     | 1     | (00)    | 8868.5307                 | 48.9                                                        | 8                                                            |
| 4           | 3      | 2      | 4           | 2     | 3     | (00)    | 9943.3883                 | 353.9                                                       | -2                                                           |
| 4           | 4      | 0      | 4           | 3     | 1     | (00)    | 13568.7902                | 305.5                                                       | 3                                                            |
| 4           | 4      | 1      | 4           | 3     | 2     | (00)    | 13602.0320                | 306.5                                                       | 4                                                            |
| 5           | 0      | 5      | 4           | 0     | 4     | (00)    | 10119.3810                | 39.9                                                        | -2                                                           |
| 5           | 0      | 5      | 4           | 1     | 4     | (00)    | 9423.7839                 | -9.3                                                        | 3                                                            |
| 5           | 1      | 4      | 4           | 1     | 3     | (00)    | 11618.4966                | 72.8                                                        | 2                                                            |
| 5           | 1      | 4      | 4           | 2     | 3     | (00)    | 7512.5056                 | -141.6                                                      | 6                                                            |
| 5           | 1      | 5      | 4           | 0     | 4     | (00)    | 10534.9414                | 79.6                                                        | 0                                                            |
| 5           | 1      | 5      | 4           | 1     | 4     | (00)    | 9839.3384                 | 24.5                                                        | -1                                                           |
| 5           | 2      | 3      | 4           | 2     | 2     | (00)    | 11694.1571                | 58.6                                                        | 3                                                            |

|   |   |   |   |   |   |      |            |        |    |
|---|---|---|---|---|---|------|------------|--------|----|
| 5 | 2 | 4 | 4 | 1 | 3 | (00) | 14954.6644 | 264.8  | -1 |
| 5 | 2 | 4 | 4 | 2 | 3 | (00) | 10848.6692 | 46.2   | -1 |
| 5 | 2 | 4 | 5 | 1 | 5 | (00) | 8835.3842  | 337.1  | -2 |
| 5 | 3 | 2 | 4 | 3 | 1 | (00) | 11204.6107 | 47.2   | 1  |
| 5 | 3 | 2 | 5 | 2 | 3 | (00) | 8744.7368  | 333.5  | -7 |
| 5 | 3 | 3 | 4 | 3 | 2 | (00) | 11106.9647 | 49.4   | 3  |
| 5 | 3 | 3 | 5 | 2 | 4 | (00) | 10201.6803 | 353.7  | -1 |
| 5 | 4 | 1 | 4 | 4 | 0 | (00) | 11089.7140 | 53.9   | 10 |
| 5 | 4 | 1 | 5 | 3 | 2 | (00) | 13453.8826 | 301.3  | 0  |
| 5 | 4 | 2 | 4 | 4 | 1 | (00) | 11086.8190 | 44.4   | 0  |
| 5 | 4 | 2 | 5 | 3 | 3 | (00) | 13581.8839 | 299.1  | -1 |
| 5 | 5 | 0 | 5 | 4 | 1 | (00) | 17482.4820 | 67.0   | 12 |
| 5 | 5 | 1 | 5 | 4 | 2 | (00) | 17485.7104 | 70.6   | 15 |
| 6 | 0 | 6 | 5 | 0 | 5 | (00) | 11904.7974 | 37.9   | -1 |
| 6 | 0 | 6 | 5 | 1 | 5 | (00) | 11489.2413 | 2.4    | 2  |
| 6 | 1 | 5 | 5 | 1 | 4 | (00) | 13726.1036 | 83.7   | 6  |
| 6 | 1 | 5 | 5 | 2 | 4 | (00) | 10389.9349 | -109.1 | 8  |
| 6 | 1 | 6 | 5 | 0 | 5 | (00) | 12135.6603 | 66.0   | 3  |
| 6 | 1 | 6 | 5 | 1 | 5 | (00) | 11720.0998 | 26.2   | 1  |
| 6 | 2 | 4 | 5 | 2 | 3 | (00) | 14166.8505 | 66.7   | 3  |
| 6 | 2 | 5 | 5 | 1 | 4 | (00) | 16259.2982 | 241.8  | -2 |
| 6 | 2 | 5 | 5 | 2 | 4 | (00) | 12923.1338 | 53.3   | 4  |
| 6 | 2 | 5 | 6 | 0 | 6 | (00) | 10269.2722 | 383.4  | -4 |
| 6 | 2 | 5 | 6 | 1 | 6 | (00) | 10038.4134 | 359.3  | -4 |
| 6 | 3 | 3 | 5 | 3 | 2 | (00) | 13586.9565 | 50.6   | 4  |
| 6 | 3 | 3 | 6 | 2 | 4 | (00) | 8164.8418  | 316.4  | -7 |
| 6 | 3 | 4 | 5 | 3 | 3 | (00) | 13341.0087 | 50.9   | 2  |
| 6 | 3 | 4 | 6 | 1 | 5 | (00) | 13152.7577 | 517.3  | -4 |
| 6 | 3 | 4 | 6 | 2 | 5 | (00) | 10619.5555 | 351.6  | -3 |
| 6 | 4 | 2 | 5 | 4 | 1 | (00) | 13352.6276 | 46.0   | 1  |
| 6 | 4 | 2 | 6 | 3 | 3 | (00) | 13219.5547 | 297.7  | -2 |
| 6 | 4 | 3 | 5 | 4 | 2 | (00) | 13339.8509 | 47.2   | 2  |
| 6 | 4 | 3 | 6 | 3 | 4 | (00) | 13580.7267 | 296.0  | 0  |
| 6 | 5 | 1 | 5 | 5 | 0 | (00) | 13296.8992 | 42.8   | 1  |
| 6 | 5 | 1 | 6 | 4 | 2 | (00) | 17426.7496 | 59.9   | 8  |
| 6 | 5 | 2 | 5 | 5 | 1 | (00) | 13296.6531 | 41.3   | 0  |
| 6 | 5 | 2 | 6 | 4 | 3 | (00) | 17442.5101 | 62.2   | 10 |
| 7 | 0 | 7 | 6 | 0 | 6 | (00) | 13686.8064 | 34.2   | 2  |
| 7 | 0 | 7 | 6 | 1 | 6 | (00) | 13455.9484 | 11.0   | 3  |
| 7 | 1 | 6 | 6 | 1 | 5 | (00) | 15702.2764 | 80.7   | 1  |
| 7 | 1 | 6 | 6 | 2 | 5 | (00) | 13169.0780 | -81.2  | 6  |

|   |   |   |   |   |   |      |            |        |    |
|---|---|---|---|---|---|------|------------|--------|----|
| 7 | 1 | 6 | 7 | 0 | 7 | (00) | 9751.5456  | 269.8  | 2  |
| 7 | 1 | 6 | 7 | 1 | 7 | (00) | 9629.8115  | 251.0  | -1 |
| 7 | 1 | 7 | 6 | 0 | 6 | (00) | 13808.5363 | 48.8   | 1  |
| 7 | 1 | 7 | 6 | 1 | 6 | (00) | 13577.6772 | 24.4   | 1  |
| 7 | 2 | 5 | 6 | 2 | 4 | (00) | 16577.8623 | 70.8   | 2  |
| 7 | 2 | 6 | 6 | 1 | 5 | (00) | 17484.5005 | 211.3  | -4 |
| 7 | 2 | 6 | 6 | 2 | 5 | (00) | 14951.3024 | 49.8   | 1  |
| 7 | 2 | 6 | 7 | 0 | 7 | (00) | 11533.7696 | 400.3  | -3 |
| 7 | 2 | 6 | 7 | 1 | 7 | (00) | 11412.0393 | 385.4  | -3 |
| 7 | 3 | 4 | 6 | 3 | 3 | (00) | 16059.4238 | 45.7   | 3  |
| 7 | 3 | 4 | 7 | 2 | 5 | (00) | 7646.4041  | 292.1  | -5 |
| 7 | 3 | 5 | 6 | 3 | 4 | (00) | 15557.8054 | 48.8   | 2  |
| 7 | 3 | 5 | 7 | 1 | 6 | (00) | 13008.2828 | 481.5  | -7 |
| 7 | 3 | 5 | 7 | 2 | 6 | (00) | 11226.0596 | 351.7  | -1 |
| 7 | 4 | 3 | 6 | 4 | 2 | (00) | 15648.0812 | 42.8   | 1  |
| 7 | 4 | 3 | 7 | 3 | 4 | (00) | 12808.2115 | 294.1  | -4 |
| 7 | 4 | 4 | 6 | 4 | 3 | (00) | 15606.6285 | 42.7   | 1  |
| 7 | 5 | 2 | 6 | 5 | 1 | (00) | 15548.0732 | 38.0   | 0  |
| 7 | 5 | 2 | 7 | 4 | 3 | (00) | 17326.7418 | 55.4   | 7  |
| 7 | 5 | 3 | 6 | 5 | 2 | (00) | 15546.7419 | 37.3   | -1 |
| 7 | 5 | 3 | 7 | 4 | 4 | (00) | 17382.6218 | 55.1   | 7  |
| 8 | 0 | 8 | 7 | 0 | 7 | (00) | 15478.8442 | 26.2   | 2  |
| 8 | 0 | 8 | 7 | 1 | 7 | (00) | 15357.1143 | 11.6   | 2  |
| 8 | 1 | 7 | 7 | 1 | 6 | (00) | 17554.1598 | 76.4   | 1  |
| 8 | 1 | 7 | 7 | 2 | 6 | (00) | 15771.9354 | -54.6  | 5  |
| 8 | 1 | 7 | 8 | 0 | 8 | (00) | 11826.8599 | 318.7  | -1 |
| 8 | 1 | 7 | 8 | 1 | 8 | (00) | 11765.0277 | 310.6  | 0  |
| 8 | 1 | 8 | 7 | 0 | 7 | (00) | 15540.6774 | 35.3   | 2  |
| 8 | 1 | 8 | 7 | 1 | 7 | (00) | 15418.9468 | 20.0   | 2  |
| 8 | 2 | 6 | 7 | 2 | 5 | (00) | 18892.6349 | 70.4   | 3  |
| 8 | 2 | 6 | 7 | 3 | 5 | (00) | 12125.0505 | -224.6 | 13 |
| 8 | 2 | 7 | 7 | 1 | 6 | (00) | 18714.5864 | 176.5  | -3 |
| 8 | 2 | 7 | 7 | 2 | 6 | (00) | 16932.3613 | 44.8   | 1  |
| 8 | 2 | 7 | 8 | 0 | 8 | (00) | 12987.2872 | 419.5  | -4 |
| 8 | 2 | 7 | 8 | 1 | 8 | (00) | 12925.4540 | 410.4  | -3 |
| 8 | 3 | 5 | 7 | 3 | 4 | (00) | 18606.7429 | 38.9   | 4  |
| 8 | 3 | 5 | 8 | 2 | 6 | (00) | 7360.5128  | 261.3  | -4 |
| 8 | 3 | 6 | 7 | 3 | 5 | (00) | 17744.2847 | 42.4   | 1  |
| 8 | 3 | 6 | 8 | 2 | 7 | (00) | 12037.9827 | 349.0  | -1 |
| 8 | 4 | 4 | 7 | 4 | 3 | (00) | 17991.6367 | 33.4   | 1  |
| 8 | 4 | 4 | 8 | 3 | 5 | (00) | 12193.1062 | 289.5  | -5 |

|    |   |    |    |   |   |      |            |       |    |
|----|---|----|----|---|---|------|------------|-------|----|
| 8  | 4 | 5  | 7  | 4 | 4 | (00) | 17882.5015 | 34.0  | 1  |
| 8  | 5 | 3  | 8  | 4 | 4 | (00) | 17152.1554 | 50.8  | 5  |
| 8  | 5 | 4  | 7  | 5 | 3 | (00) | 17811.8169 | 26.8  | -2 |
| 8  | 5 | 4  | 8  | 4 | 5 | (00) | 17311.9388 | 49.4  | 6  |
| 8  | 6 | 2  | 7  | 6 | 1 | (00) | 17752.9054 | 20.5  | -3 |
| 8  | 6 | 3  | 7  | 6 | 2 | (00) | 17752.7875 | 22.9  | -1 |
| 8  | 7 | 1  | 7  | 7 | 0 | (00) | 17716.8778 | 18.7  | 1  |
| 8  | 7 | 2  | 7  | 7 | 1 | (00) | 17716.8661 | 8.3   | -9 |
| 9  | 0 | 9  | 8  | 0 | 8 | (00) | 17281.0824 | 16.2  | 2  |
| 9  | 1 | 8  | 8  | 1 | 7 | (00) | 19325.0153 | 64.9  | 0  |
| 9  | 1 | 8  | 8  | 2 | 7 | (00) | 18164.5890 | -34.9 | 4  |
| 9  | 1 | 9  | 8  | 0 | 8 | (00) | 17311.6355 | 21.2  | 1  |
| 9  | 1 | 9  | 8  | 1 | 8 | (00) | 17249.8034 | 13.2  | 3  |
| 9  | 2 | 7  | 8  | 2 | 6 | (00) | 21084.8908 | 63.7  | 2  |
| 9  | 2 | 8  | 8  | 1 | 7 | (00) | 20029.8104 | 136.5 | -3 |
| 9  | 2 | 8  | 8  | 2 | 7 | (00) | 18869.3839 | 36.5  | 1  |
| 9  | 3 | 6  | 8  | 3 | 5 | (00) | 21175.7469 | 27.6  | 3  |
| 9  | 3 | 6  | 9  | 2 | 7 | (00) | 7451.3690  | 225.3 | -2 |
| 9  | 3 | 7  | 8  | 3 | 6 | (00) | 19889.2882 | 31.6  | 1  |
| 9  | 3 | 7  | 9  | 2 | 8 | (00) | 13057.8861 | 343.3 | -1 |
| 9  | 4 | 5  | 8  | 4 | 4 | (00) | 20403.6575 | 16.4  | 1  |
| 9  | 4 | 5  | 9  | 3 | 6 | (00) | 11421.0170 | 278.5 | -7 |
| 9  | 4 | 6  | 8  | 4 | 5 | (00) | 20158.8991 | 19.6  | 0  |
| 9  | 5 | 4  | 8  | 5 | 3 | (00) | 20109.1479 | 12.9  | -1 |
| 9  | 5 | 4  | 9  | 4 | 5 | (00) | 16857.6454 | 46.9  | 3  |
| 9  | 5 | 5  | 8  | 5 | 4 | (00) | 20092.5734 | 12.4  | -1 |
| 9  | 6 | 3  | 8  | 6 | 2 | (00) | 20012.1348 | 4.9   | -4 |
| 9  | 6 | 4  | 8  | 6 | 3 | (00) | 20011.5811 | 5.4   | -3 |
| 9  | 7 | 2  | 8  | 7 | 1 | (00) | 19960.3545 | -7.5  | 1  |
| 9  | 7 | 3  | 8  | 7 | 2 | (00) | 19960.3545 | 2.4   | -9 |
| 9  | 8 | 1  | 8  | 8 | 0 | (00) | 19927.5564 | -13.9 | -7 |
| 9  | 8 | 2  | 8  | 8 | 1 | (00) | 19927.5564 | -13.8 | -7 |
| 10 | 0 | 10 | 9  | 0 | 9 | (00) | 19090.2981 | 4.3   | 2  |
| 10 | 0 | 10 | 9  | 1 | 9 | (00) | 19059.7449 | -0.8  | 2  |
| 10 | 1 | 9  | 9  | 1 | 8 | (00) | 21068.9814 | 46.8  | -1 |
| 10 | 1 | 10 | 9  | 0 | 9 | (00) | 19105.0796 | 7.5   | 2  |
| 10 | 1 | 10 | 9  | 1 | 9 | (00) | 19074.5265 | 2.6   | 2  |
| 10 | 2 | 8  | 9  | 2 | 7 | (00) | 23133.3035 | 50.2  | 0  |
| 10 | 2 | 8  | 10 | 1 | 9 | (00) | 11403.3653 | 176.9 | 2  |
| 10 | 2 | 8  | 10 | 2 | 9 | (00) | 10998.7898 | 129.5 | 5  |
| 10 | 2 | 9  | 9  | 1 | 8 | (00) | 21473.5573 | 94.7  | -4 |

|    |   |    |    |   |    |      |            |        |     |
|----|---|----|----|---|----|------|------------|--------|-----|
| 10 | 2 | 9  | 9  | 2 | 8  | (00) | 20768.7636 | 24.5   | 1   |
| 10 | 3 | 7  | 9  | 3 | 6  | (00) | 23699.3248 | 11.6   | 2   |
| 10 | 3 | 7  | 10 | 2 | 8  | (00) | 8017.3908  | 187.2  | 1   |
| 10 | 3 | 8  | 9  | 3 | 7  | (00) | 21984.9651 | 14.3   | -1  |
| 10 | 3 | 8  | 10 | 2 | 9  | (00) | 14274.0875 | 333.0  | -3  |
| 10 | 4 | 6  | 9  | 4 | 5  | (00) | 22902.5379 | -7.4   | 2   |
| 10 | 4 | 6  | 10 | 3 | 7  | (00) | 10624.2288 | 258.3  | -9  |
| 10 | 4 | 7  | 9  | 4 | 6  | (00) | 22423.9926 | -1.8   | -1  |
| 10 | 5 | 5  | 9  | 5 | 4  | (00) | 22432.6913 | -9.4   | -1  |
| 10 | 5 | 6  | 9  | 5 | 5  | (00) | 22387.9534 | -10.2  | -2  |
| 10 | 6 | 4  | 9  | 6 | 3  | (00) | 22286.4613 | -17.8  | -4  |
| 10 | 6 | 5  | 9  | 6 | 4  | (00) | 22284.4200 | -17.6  | -4  |
| 10 | 7 | 3  | 9  | 7 | 2  | (00) | 22214.2012 | -29.4  | -8  |
| 10 | 7 | 4  | 9  | 7 | 3  | (00) | 22214.1521 | -26.4  | -5  |
| 11 | 0 | 11 | 10 | 0 | 10 | (00) | 20903.6217 | -9.6   | 2   |
| 11 | 0 | 11 | 10 | 1 | 10 | (00) | 20888.8398 | -13.2  | 1   |
| 11 | 1 | 10 | 10 | 1 | 9  | (00) | 22820.9622 | 24.6   | -1  |
| 11 | 1 | 11 | 10 | 0 | 10 | (00) | 20910.6536 | -8.2   | 2   |
| 11 | 1 | 11 | 10 | 1 | 10 | (00) | 20895.8725 | -11    | 2   |
| 11 | 2 | 9  | 10 | 2 | 8  | (00) | 25033.5778 | 31.6   | -2  |
| 11 | 2 | 10 | 10 | 1 | 9  | (00) | 23043.3264 | 55.3   | -3  |
| 11 | 2 | 10 | 10 | 2 | 9  | (00) | 22638.7500 | 7.0    | -1  |
| 12 | 0 | 12 | 11 | 0 | 11 | (00) | 22719.1937 | -26.7  | 2   |
| 12 | 0 | 12 | 11 | 1 | 11 | (00) | 22712.1618 | -28.1  | 2   |
| 12 | 1 | 11 | 11 | 1 | 10 | (00) | 24591.8735 | -2.0   | -3  |
| 12 | 1 | 12 | 11 | 0 | 11 | (00) | 22722.4942 | -25.6  | 2   |
| 12 | 1 | 12 | 11 | 1 | 11 | (00) | 22715.4618 | -27.5  | 2   |
| 2  | 0 | 2  | 1  | 0 | 1  | (10) | 4332.5698  | 5.1    | -1  |
| 2  | 1 | 1  | 1  | 1 | 0  | (10) | 4756.9004  | -57.4  | -2  |
| 2  | 1 | 2  | 1  | 0 | 1  | (10) | 5775.6664  | -13.9  | 0   |
| 2  | 1 | 2  | 1  | 1 | 1  | (10) | 4016.3401  | 69.9   | -9  |
| 2  | 2 | 0  | 1  | 1 | 0  | (10) | 10190.6585 | 612.3  | 6   |
| 2  | 2 | 0  | 1  | 1 | 1  | (10) | 10581.0515 | 802.6  | -10 |
| 2  | 2 | 1  | 1  | 1 | 0  | (10) | 9970.2232  | -822.0 | -2  |
| 2  | 2 | 1  | 1  | 1 | 1  | (10) | 10360.6373 | -610.6 | 3   |
| 3  | 0 | 3  | 2  | 0 | 2  | (10) | 6371.9793  | 13.7   | -1  |
| 3  | 1 | 2  | 2  | 1 | 1  | (10) | 7104.8527  | -7.7   | 0   |
| 3  | 1 | 3  | 2  | 0 | 2  | (10) | 7430.0368  | 16.0   | 1   |
| 3  | 1 | 3  | 2  | 1 | 2  | (10) | 5986.9404  | 35.3   | 0   |
| 3  | 2 | 1  | 2  | 1 | 1  | (10) | 12175.3318 | 415.4  | -2  |
| 3  | 2 | 1  | 2  | 1 | 2  | (10) | 13306.2956 | 488.9  | -1  |

|   |   |   |   |   |   |      |            |         |    |
|---|---|---|---|---|---|------|------------|---------|----|
| 3 | 2 | 1 | 2 | 2 | 0 | (10) | 6741.5820  | -246.0  | -2 |
| 3 | 2 | 2 | 2 | 1 | 1 | (10) | 11839.3041 | -494.3  | -1 |
| 3 | 2 | 2 | 2 | 1 | 2 | (10) | 12970.2648 | -423.9  | -3 |
| 3 | 2 | 2 | 2 | 2 | 1 | (10) | 6625.9786  | 267.5   | -4 |
| 3 | 3 | 0 | 3 | 2 | 1 | (10) | 9666.0707  | 505.4   | -6 |
| 3 | 3 | 1 | 3 | 2 | 2 | (10) | 9680.9347  | -747.4  | -5 |
| 4 | 0 | 4 | 3 | 0 | 3 | (10) | 8291.9296  | 23.4    | 1  |
| 4 | 1 | 3 | 3 | 1 | 2 | (10) | 9399.3798  | -1.8    | 1  |
| 4 | 1 | 4 | 3 | 0 | 3 | (10) | 8987.1593  | 31.1    | 1  |
| 4 | 1 | 4 | 3 | 1 | 3 | (10) | 7929.1028  | 29.7    | 0  |
| 4 | 2 | 2 | 3 | 1 | 3 | (10) | 16508.3944 | 201.8   | 0  |
| 4 | 2 | 2 | 3 | 2 | 1 | (10) | 9189.0401  | -250.9  | 2  |
| 4 | 2 | 3 | 3 | 1 | 2 | (10) | 13488.9417 | -206    | -3 |
| 4 | 2 | 3 | 3 | 2 | 2 | (10) | 8754.4925  | 282.9   | 1  |
| 4 | 3 | 1 | 3 | 3 | 0 | (10) | 8881.8321  | 8.7     | 5  |
| 4 | 3 | 1 | 4 | 2 | 2 | (10) | 9358.8611  | 763.5   | -4 |
| 4 | 3 | 1 | 4 | 2 | 3 | (10) | 10129.4410 | 1144    | 1  |
| 4 | 3 | 2 | 3 | 3 | 1 | (10) | 8881.7445  | 28.9    | 7  |
| 4 | 3 | 2 | 4 | 2 | 3 | (10) | 9808.1873  | -1000.8 | 1  |
| 4 | 4 | 0 | 4 | 3 | 1 | (10) | 13631.5365 | -17.6   | 6  |
| 4 | 4 | 1 | 4 | 3 | 2 | (10) | 13524.7096 | -681.2  | -2 |
| 5 | 0 | 5 | 4 | 0 | 4 | (10) | 10118.7934 | 32.1    | 3  |
| 5 | 0 | 5 | 4 | 1 | 4 | (10) | 9423.5621  | 22.9    | 1  |
| 5 | 1 | 4 | 4 | 1 | 3 | (10) | 11615.8258 | -3.9    | -2 |
| 5 | 1 | 4 | 4 | 2 | 3 | (10) | 7526.2626  | 198.9   | 1  |
| 5 | 1 | 5 | 4 | 0 | 4 | (10) | 10534.2403 | 40.7    | 3  |
| 5 | 1 | 5 | 4 | 1 | 4 | (10) | 9839.0091  | 31.5    | 1  |
| 5 | 2 | 3 | 4 | 2 | 2 | (10) | 11684.7212 | -93.5   | 3  |
| 5 | 2 | 4 | 4 | 1 | 3 | (10) | 14944.7760 | -82.2   | -1 |
| 5 | 2 | 4 | 4 | 2 | 2 | (10) | 10084.6322 | -260.6  | -4 |
| 5 | 2 | 4 | 4 | 2 | 3 | (10) | 10855.2143 | 122.1   | 3  |
| 5 | 2 | 4 | 5 | 1 | 5 | (10) | 8824.9174  | -117.3  | -3 |
| 5 | 3 | 2 | 4 | 3 | 1 | (10) | 11164.9415 | -74.5   | 0  |
| 5 | 3 | 2 | 4 | 3 | 2 | (10) | 11486.1987 | 2073.7  | 3  |
| 5 | 3 | 2 | 5 | 2 | 3 | (10) | 8839.0842  | 785.2   | -4 |
| 5 | 3 | 2 | 5 | 2 | 4 | (10) | 10439.1712 | 950.3   | 1  |
| 5 | 3 | 3 | 4 | 3 | 2 | (10) | 11143.7922 | 97.4    | 2  |
| 5 | 3 | 3 | 5 | 2 | 4 | (10) | 10096.7614 | -1029.3 | -3 |
| 5 | 4 | 1 | 4 | 4 | 0 | (10) | 11086.2124 | 8.0     | 1  |
| 5 | 4 | 1 | 5 | 3 | 2 | (10) | 13552.8010 | 58.5    | 1  |
| 5 | 4 | 2 | 4 | 4 | 1 | (10) | 11087.4915 | 10.9    | 2  |



|   |   |   |   |   |   |      |            |         |    |
|---|---|---|---|---|---|------|------------|---------|----|
| 5 | 4 | 2 | 5 | 3 | 3 | (10) | 13468.4077 | -768.9  | -3 |
| 5 | 5 | 0 | 5 | 4 | 1 | (10) | 17528.6994 | -492.3  | 5  |
| 5 | 5 | 1 | 5 | 4 | 2 | (10) | 17420.8012 | -1059.3 | 2  |
| 6 | 0 | 6 | 5 | 0 | 5 | (10) | 11904.2636 | 33.5    | 0  |
| 6 | 0 | 6 | 5 | 1 | 5 | (10) | 11488.8179 | 26.2    | 1  |
| 6 | 1 | 5 | 5 | 1 | 4 | (10) | 13723.5212 | -3.1    | -2 |
| 6 | 1 | 5 | 5 | 2 | 4 | (10) | 10394.5723 | 76.5    | -1 |
| 6 | 1 | 6 | 5 | 0 | 5 | (10) | 12135.1005 | 38.4    | -2 |
| 6 | 1 | 6 | 5 | 1 | 5 | (10) | 11719.6555 | 31.8    | 0  |
| 6 | 2 | 4 | 5 | 2 | 3 | (10) | 14161.4911 | -45.4   | 1  |
| 6 | 2 | 5 | 5 | 1 | 4 | (10) | 16253.5751 | -27.0   | -2 |
| 6 | 2 | 5 | 5 | 2 | 4 | (10) | 12924.6296 | 56.0    | 3  |
| 6 | 2 | 5 | 6 | 0 | 6 | (10) | 10260.7274 | -89.2   | -3 |
| 6 | 2 | 5 | 6 | 1 | 6 | (10) | 10029.8902 | -94.4   | -1 |
| 6 | 3 | 3 | 5 | 3 | 2 | (10) | 13535.3035 | -315.6  | 1  |
| 6 | 3 | 3 | 6 | 2 | 4 | (10) | 8212.8950  | 513.4   | -6 |
| 6 | 3 | 3 | 6 | 2 | 5 | (10) | 11049.8436 | 577.2   | -2 |
| 6 | 3 | 4 | 5 | 3 | 2 | (10) | 13046.7746 | -1652.4 | 0  |
| 6 | 3 | 4 | 5 | 3 | 3 | (10) | 13389.1805 | 323.4   | 0  |
| 6 | 3 | 4 | 6 | 1 | 5 | (10) | 13091.3667 | -785.4  | -5 |
| 6 | 3 | 4 | 6 | 2 | 5 | (10) | 10561.3153 | -759    | -3 |
| 6 | 4 | 2 | 5 | 4 | 1 | (10) | 13343.5758 | -1.8    | 1  |
| 6 | 4 | 2 | 6 | 3 | 3 | (10) | 13361.0733 | 372.4   | 1  |
| 6 | 4 | 3 | 5 | 4 | 2 | (10) | 13345.4533 | 4.2     | -1 |
| 6 | 4 | 3 | 6 | 3 | 4 | (10) | 13424.6828 | -1085.8 | -2 |
| 6 | 5 | 1 | 5 | 5 | 0 | (10) | 13294.4786 | -1.9    | -1 |
| 6 | 5 | 1 | 6 | 4 | 2 | (10) | 17479.6088 | -485.8  | 10 |
| 6 | 5 | 2 | 5 | 5 | 1 | (10) | 13295.6839 | 2.9     | 6  |
| 6 | 5 | 2 | 6 | 4 | 3 | (10) | 17371.0242 | -1068.2 | 2  |
| 7 | 0 | 7 | 6 | 0 | 6 | (10) | 13686.2957 | 39.5    | 5  |
| 7 | 0 | 7 | 6 | 1 | 6 | (10) | 13455.4538 | 29.6    | 2  |
| 7 | 1 | 6 | 6 | 1 | 5 | (10) | 15700.0313 | 0.4     | 0  |
| 7 | 1 | 6 | 6 | 2 | 5 | (10) | 13169.9782 | 25.2    | 1  |
| 7 | 1 | 6 | 7 | 0 | 7 | (10) | 9744.4152  | -98.3   | -2 |
| 7 | 1 | 6 | 7 | 1 | 7 | (10) | 9622.6787  | -103.1  | -1 |
| 7 | 1 | 7 | 6 | 0 | 6 | (10) | 13808.0283 | 40.4    | 1  |
| 7 | 1 | 7 | 6 | 1 | 6 | (10) | 13577.1889 | 33.0    | 0  |
| 7 | 2 | 5 | 6 | 2 | 4 | (10) | 16573.2713 | -44.1   | 0  |
| 7 | 2 | 6 | 6 | 1 | 5 | (10) | 17481.0492 | 3.6     | 2  |
| 7 | 2 | 6 | 6 | 2 | 5 | (10) | 14950.9936 | 25.9    | 0  |
| 7 | 2 | 6 | 7 | 0 | 7 | (10) | 11525.4300 | -98.2   | -3 |

|   |   |   |   |   |   |      |            |         |    |
|---|---|---|---|---|---|------|------------|---------|----|
| 7 | 2 | 6 | 7 | 1 | 7 | (10) | 11403.6925 | -104.0  | -4 |
| 7 | 3 | 4 | 6 | 3 | 3 | (10) | 16026.7270 | -345.2  | 2  |
| 7 | 3 | 4 | 7 | 2 | 5 | (10) | 7666.3516  | 213.1   | -3 |
| 7 | 3 | 5 | 6 | 3 | 4 | (10) | 15586.3481 | 330.2   | 1  |
| 7 | 3 | 5 | 7 | 1 | 6 | (10) | 12977.6885 | -450.6  | 1  |
| 7 | 3 | 5 | 7 | 2 | 6 | (10) | 11196.6680 | -456.4  | -4 |
| 7 | 4 | 3 | 6 | 4 | 2 | (10) | 15625.3749 | -29.4   | 0  |
| 7 | 4 | 3 | 7 | 3 | 4 | (10) | 12959.7208 | 687.8   | -1 |
| 7 | 4 | 4 | 6 | 4 | 3 | (10) | 15625.2326 | 9.5     | 1  |
| 7 | 4 | 4 | 7 | 3 | 4 | (10) | 12534.6598 | -2067.6 | -4 |
| 7 | 5 | 2 | 6 | 5 | 1 | (10) | 15544.4971 | -15.6   | -2 |
| 7 | 5 | 2 | 7 | 4 | 3 | (10) | 17398.7327 | -470.3  | 10 |
| 7 | 5 | 3 | 6 | 5 | 2 | (10) | 15546.2983 | -15.3   | -1 |
| 7 | 5 | 3 | 7 | 4 | 4 | (10) | 17292.0926 | -1090.2 | 3  |
| 7 | 6 | 1 | 6 | 6 | 0 | (10) | 15503.9428 | -17.3   | -2 |
| 8 | 0 | 8 | 7 | 0 | 7 | (10) | 15478.3367 | 34.4    | 1  |
| 8 | 0 | 8 | 7 | 1 | 7 | (10) | 15356.6001 | 29.5    | 1  |
| 8 | 1 | 7 | 7 | 1 | 6 | (10) | 17552.2546 | -0.1    | 0  |
| 8 | 1 | 7 | 7 | 2 | 6 | (10) | 15771.2388 | -1.2    | 0  |
| 8 | 1 | 7 | 8 | 0 | 8 | (10) | 11818.3325 | -133.4  | -3 |
| 8 | 1 | 7 | 8 | 1 | 8 | (10) | 11756.4897 | -135.8  | -2 |
| 8 | 1 | 8 | 7 | 0 | 7 | (10) | 15540.1804 | 37.7    | 0  |
| 8 | 1 | 8 | 7 | 1 | 7 | (10) | 15418.4436 | 32.6    | 0  |
| 8 | 2 | 6 | 7 | 2 | 5 | (10) | 18888.0211 | -59.2   | -1 |
| 8 | 2 | 6 | 7 | 3 | 5 | (10) | 12150.5809 | 392.6   | 8  |
| 8 | 2 | 7 | 7 | 1 | 6 | (10) | 18712.3239 | 11.1    | 0  |
| 8 | 2 | 7 | 7 | 2 | 6 | (10) | 16931.3078 | 9.7     | 0  |
| 8 | 2 | 7 | 8 | 0 | 8 | (10) | 12978.4037 | -120.2  | -1 |
| 8 | 2 | 7 | 8 | 1 | 8 | (10) | 12916.5570 | -126.6  | -4 |
| 8 | 3 | 5 | 7 | 3 | 4 | (10) | 18590.8646 | -201.9  | 2  |
| 8 | 3 | 5 | 8 | 2 | 6 | (10) | 7369.1969  | 72.2    | 2  |
| 8 | 3 | 6 | 7 | 3 | 5 | (10) | 17755.2208 | 148.8   | 0  |
| 8 | 3 | 6 | 8 | 2 | 7 | (10) | 12020.5820 | -316.3  | -3 |
| 8 | 4 | 4 | 7 | 4 | 3 | (10) | 17946.1232 | -127    | 0  |
| 8 | 4 | 4 | 8 | 3 | 5 | (10) | 12314.9821 | 765.4   | -1 |
| 8 | 4 | 5 | 7 | 4 | 4 | (10) | 17923.2271 | 71.3    | 0  |
| 8 | 5 | 3 | 8 | 4 | 4 | (10) | 17263.4237 | -377.4  | 9  |
| 8 | 5 | 4 | 7 | 5 | 3 | (10) | 17813.3874 | -30.2   | -1 |
| 8 | 5 | 4 | 8 | 4 | 5 | (10) | 17182.2516 | -1193   | 0  |
| 8 | 6 | 2 | 7 | 6 | 1 | (10) | 17749.7231 | -35.2   | -2 |
| 8 | 6 | 3 | 7 | 6 | 2 | (10) | 17751.3944 | -41.9   | -3 |

|    |   |    |    |   |   |      |            |        |    |
|----|---|----|----|---|---|------|------------|--------|----|
| 8  | 7 | 1  | 7  | 7 | 0 | (10) | 17713.9930 | -35.1  | 3  |
| 8  | 7 | 2  | 7  | 7 | 1 | (10) | 17715.2528 | -47.8  | 1  |
| 9  | 0 | 9  | 8  | 0 | 8 | (10) | 17280.5792 | 31.5   | 1  |
| 9  | 1 | 8  | 8  | 1 | 7 | (10) | 19323.3152 | -4.5   | 0  |
| 9  | 1 | 8  | 8  | 2 | 7 | (10) | 18163.2446 | -17.0  | 0  |
| 9  | 1 | 9  | 8  | 0 | 8 | (10) | 17311.1405 | 33.0   | 0  |
| 9  | 1 | 9  | 8  | 1 | 8 | (10) | 17249.2971 | 29.9   | 0  |
| 9  | 2 | 7  | 8  | 2 | 6 | (10) | 21080.3818 | -76.9  | -2 |
| 9  | 2 | 8  | 8  | 1 | 7 | (10) | 20028.0693 | 8.0    | -1 |
| 9  | 2 | 8  | 8  | 2 | 7 | (10) | 18867.9998 | -3.5   | -1 |
| 9  | 3 | 6  | 8  | 3 | 5 | (10) | 21166.6261 | -143.2 | 0  |
| 9  | 3 | 6  | 9  | 2 | 7 | (10) | 7455.4400  | 4.7    | 3  |
| 9  | 3 | 7  | 8  | 3 | 6 | (10) | 19892.4667 | 35.7   | 0  |
| 9  | 3 | 7  | 9  | 2 | 8 | (10) | 13045.0501 | -275.9 | 0  |
| 9  | 4 | 5  | 8  | 4 | 4 | (10) | 20344.1502 | -376.2 | 0  |
| 9  | 4 | 5  | 9  | 3 | 6 | (10) | 11492.5029 | 529.1  | -5 |
| 9  | 4 | 6  | 8  | 4 | 5 | (10) | 20212.9066 | 272.4  | 0  |
| 9  | 5 | 4  | 8  | 5 | 3 | (10) | 20096.5797 | -63.3  | -2 |
| 9  | 5 | 4  | 9  | 4 | 5 | (10) | 17015.8521 | -65.6  | 6  |
| 9  | 5 | 5  | 8  | 5 | 4 | (10) | 20099.7962 | -50.2  | -2 |
| 9  | 6 | 3  | 8  | 6 | 2 | (10) | 20008.1164 | -61.1  | -3 |
| 9  | 6 | 4  | 8  | 6 | 3 | (10) | 20010.3839 | -65.6  | -4 |
| 9  | 7 | 2  | 8  | 7 | 1 | (10) | 19956.9661 | -66.1  | -4 |
| 9  | 7 | 3  | 8  | 7 | 2 | (10) | 19958.6194 | -76.2  | -3 |
| 9  | 8 | 1  | 8  | 8 | 0 | (10) | 19924.3519 | -74.8  | -6 |
| 9  | 8 | 2  | 8  | 8 | 1 | (10) | 19925.7073 | -91.6  | -7 |
| 10 | 0 | 10 | 9  | 0 | 9 | (10) | 19089.7986 | 26.1   | 1  |
| 10 | 0 | 10 | 9  | 1 | 9 | (10) | 19059.2366 | 24.0   | 1  |
| 10 | 1 | 9  | 9  | 1 | 8 | (10) | 21067.3601 | -15.5  | -1 |
| 10 | 1 | 10 | 9  | 0 | 9 | (10) | 19104.5857 | 27.6   | 1  |
| 10 | 1 | 10 | 9  | 1 | 9 | (10) | 19074.0232 | 24.9   | 0  |
| 10 | 2 | 8  | 9  | 2 | 7 | (10) | 23129.2390 | -93.8  | -2 |
| 10 | 2 | 8  | 10 | 1 | 9 | (10) | 11394.9541 | -214.8 | -1 |
| 10 | 2 | 8  | 10 | 2 | 9 | (10) | 10990.3287 | -225.4 | 1  |
| 10 | 2 | 9  | 9  | 1 | 8 | (10) | 21471.9876 | -2.7   | -1 |
| 10 | 2 | 9  | 9  | 2 | 8 | (10) | 20767.2320 | -16.6  | -1 |
| 10 | 3 | 7  | 9  | 3 | 6 | (10) | 23692.2733 | -148.7 | 0  |
| 10 | 3 | 7  | 10 | 2 | 8 | (10) | 8018.4751  | -49.4  | 6  |
| 10 | 3 | 8  | 9  | 3 | 7 | (10) | 21984.9012 | -29.1  | -1 |
| 10 | 3 | 8  | 10 | 2 | 9 | (10) | 14262.7174 | -290.3 | -2 |
| 10 | 4 | 6  | 9  | 4 | 5 | (10) | 22857.4972 | -500.1 | 0  |

|    |   |    |    |   |    |      |            |        |    |
|----|---|----|----|---|----|------|------------|--------|----|
| 10 | 4 | 6  | 10 | 3 | 7  | (10) | 10657.7257 | 176.6  | -5 |
| 10 | 4 | 7  | 9  | 4 | 6  | (10) | 22462.7889 | 331.7  | -1 |
| 10 | 5 | 5  | 9  | 5 | 4  | (10) | 22406.6924 | -107.8 | -1 |
| 10 | 5 | 6  | 9  | 5 | 5  | (10) | 22407.8992 | -65.8  | -2 |
| 10 | 6 | 4  | 9  | 6 | 3  | (10) | 22280.9952 | -93.9  | -4 |
| 10 | 6 | 5  | 9  | 6 | 4  | (10) | 22284.0071 | -94.5  | -4 |
| 10 | 7 | 3  | 9  | 7 | 2  | (10) | 22210.2346 | -98.8  | -6 |
| 10 | 7 | 4  | 9  | 7 | 3  | (10) | 22212.3642 | -109.2 | -6 |
| 11 | 0 | 11 | 10 | 0 | 10 | (10) | 20903.1257 | 17.8   | 0  |
| 11 | 0 | 11 | 10 | 1 | 10 | (10) | 20888.3393 | 17.1   | 1  |
| 11 | 1 | 10 | 10 | 1 | 9  | (10) | 22819.3593 | -29.3  | -2 |
| 11 | 1 | 11 | 10 | 0 | 10 | (10) | 20910.1613 | 18.6   | 0  |
| 11 | 1 | 11 | 10 | 1 | 10 | (10) | 20895.3747 | 17.7   | 1  |
| 11 | 2 | 9  | 10 | 2 | 8  | (10) | 25030.1003 | -112.6 | -3 |
| 11 | 2 | 10 | 10 | 1 | 9  | (10) | 23041.7838 | -19.8  | -2 |
| 11 | 2 | 10 | 10 | 2 | 9  | (10) | 22637.1569 | -31.9  | -2 |
| 11 | 4 | 7  | 11 | 3 | 8  | (10) | 10002.8745 | -27.7  | -2 |
| 12 | 0 | 12 | 11 | 0 | 11 | (10) | 22718.7034 | 7.7    | 1  |
| 12 | 0 | 12 | 11 | 1 | 11 | (10) | 22711.6682 | 7.3    | 2  |
| 12 | 1 | 11 | 11 | 1 | 10 | (10) | 24590.2712 | -46.3  | -2 |
| 12 | 1 | 12 | 11 | 0 | 11 | (10) | 22722.0062 | 8.8    | 2  |
| 12 | 1 | 12 | 11 | 1 | 11 | (10) | 22714.9695 | 6.8    | 1  |
| 2  | 0 | 2  | 1  | 0 | 1  | (01) | 4036.8715  | -525   | 4  |
| 2  | 1 | 1  | 1  | 1 | 1  | (01) | 4493.1677  | -7.3   | 0  |
| 2  | 1 | 2  | 1  | 0 | 1  | (01) | 5005.8439  | -437.9 | 3  |
| 2  | 2 | 0  | 1  | 1 | 0  | (01) | 15622.8461 | 1262.8 | 7  |
| 2  | 2 | 0  | 2  | 2 | 1  | (01) | 11195.9530 | 1249.2 | 7  |
| 2  | 2 | 1  | 1  | 1 | 1  | (01) | 11778.1065 | 1207   | -3 |
| 2  | 2 | 1  | 2  | 1 | 1  | (01) | 7284.9387  | 1214.3 | -2 |
| 3  | 0 | 3  | 2  | 0 | 2  | (01) | 6249.3910  | -146.1 | 0  |
| 3  | 1 | 2  | 2  | 1 | 1  | (01) | 6738.6138  | -383.5 | 2  |
| 3  | 1 | 2  | 2  | 1 | 2  | (01) | 9754.2144  | 1213.9 | 1  |
| 3  | 1 | 3  | 2  | 0 | 2  | (01) | 7232.2409  | 117.1  | 0  |
| 3  | 1 | 3  | 2  | 1 | 2  | (01) | 6263.2583  | 19.7   | -9 |
| 3  | 2 | 1  | 2  | 2 | 1  | (01) | 6673.0470  | 12.3   | -1 |
| 3  | 2 | 2  | 2  | 0 | 2  | (01) | 11970.0523 | -701.7 | 22 |
| 3  | 2 | 2  | 2  | 1 | 2  | (01) | 11001.0623 | -806.5 | 5  |
| 3  | 3 | 1  | 2  | 2 | 0  | (01) | 6636.5400  | 14.0   | 0  |
| 3  | 3 | 1  | 3  | 2 | 1  | (01) | 11159.4442 | 1249.1 | 6  |
| 4  | 0 | 4  | 3  | 0 | 3  | (01) | 8283.6631  | -7.9   | -1 |
| 4  | 1 | 3  | 3  | 1 | 2  | (01) | 8897.1159  | -646.5 | 4  |

|   |   |   |   |   |   |      |            |         |     |
|---|---|---|---|---|---|------|------------|---------|-----|
| 4 | 1 | 3 | 3 | 1 | 3 | (01) | 12388.0551 | 530.7   | -3  |
| 4 | 1 | 4 | 3 | 0 | 3 | (01) | 9041.7651  | 227.2   | -5  |
| 4 | 1 | 4 | 3 | 1 | 3 | (01) | 8058.9190  | -32.2   | -1  |
| 4 | 2 | 2 | 3 | 2 | 1 | (01) | 8961.2555  | -10.9   | -1  |
| 4 | 2 | 3 | 3 | 1 | 2 | (01) | 10516.1858 | -1462.6 | 3   |
| 4 | 2 | 3 | 3 | 2 | 2 | (01) | 9269.3293  | 549.1   | -10 |
| 4 | 3 | 1 | 3 | 3 | 1 | (01) | 8874.4079  | 13.8    | -1  |
| 4 | 3 | 1 | 4 | 2 | 2 | (01) | 11072.5945 | 1271.8  | 5   |
| 4 | 3 | 2 | 4 | 2 | 3 | (01) | 7560.0322  | -1420.9 | -3  |
| 4 | 4 | 1 | 4 | 3 | 1 | (01) | 15018.9533 | 1357.9  | 7   |
| 5 | 0 | 5 | 4 | 0 | 4 | (01) | 10166.5590 | 56.8    | -3  |
| 5 | 0 | 5 | 4 | 1 | 4 | (01) | 9408.4573  | -178    | 0   |
| 5 | 1 | 4 | 4 | 1 | 3 | (01) | 11126.8437 | -457.2  | 1   |
| 5 | 1 | 5 | 4 | 0 | 4 | (01) | 10655.5298 | 202.5   | -4  |
| 5 | 1 | 5 | 4 | 1 | 4 | (01) | 9897.4283  | -32.1   | 0   |
| 5 | 2 | 3 | 4 | 2 | 2 | (01) | 11289.9594 | -146.4  | 1   |
| 5 | 2 | 4 | 4 | 1 | 3 | (01) | 13079.3795 | -524.6  | 1   |
| 5 | 2 | 4 | 4 | 2 | 3 | (01) | 11460.3052 | 287.1   | -3  |
| 5 | 2 | 4 | 5 | 1 | 5 | (01) | 7511.0947  | 77.9    | 6   |
| 5 | 3 | 2 | 4 | 3 | 1 | (01) | 11135.4581 | 12.3    | 1   |
| 5 | 3 | 2 | 5 | 2 | 3 | (01) | 10918.0933 | 1430.6  | 5   |
| 5 | 3 | 3 | 4 | 3 | 2 | (01) | 11275.9631 | 201.1   | 0   |
| 5 | 3 | 3 | 5 | 2 | 4 | (01) | 7375.6899  | -1507.1 | 0   |
| 5 | 4 | 1 | 4 | 4 | 1 | (01) | 11081.3902 | 17.1    | 0   |
| 5 | 4 | 1 | 5 | 3 | 2 | (01) | 14964.8874 | 1364.7  | 9   |
| 5 | 4 | 2 | 5 | 3 | 3 | (01) | 11740.6113 | -459.7  | -8  |
| 5 | 5 | 1 | 4 | 4 | 0 | (01) | 11057.1007 | 21.1    | 0   |
| 6 | 0 | 6 | 5 | 0 | 5 | (01) | 11957.5582 | 57.0    | -3  |
| 6 | 0 | 6 | 5 | 1 | 5 | (01) | 11468.5889 | -87.2   | -1  |
| 6 | 1 | 5 | 5 | 1 | 4 | (01) | 13388.4191 | -212.1  | -2  |
| 6 | 1 | 5 | 5 | 2 | 4 | (01) | 11435.8828 | -145.3  | -2  |
| 6 | 1 | 6 | 5 | 0 | 5 | (01) | 12237.9932 | 121.0   | -3  |
| 6 | 1 | 6 | 5 | 1 | 5 | (01) | 11749.0228 | -24.3   | -2  |
| 6 | 2 | 4 | 5 | 2 | 3 | (01) | 13599.2245 | -508.0  | 1   |
| 6 | 2 | 4 | 5 | 3 | 3 | (01) | 11717.6261 | 3623    | -10 |
| 6 | 2 | 5 | 5 | 1 | 4 | (01) | 15366.5396 | 21.2    | -3  |
| 6 | 2 | 5 | 5 | 2 | 4 | (01) | 13414.0047 | 89.5    | -1  |
| 6 | 2 | 5 | 6 | 1 | 6 | (01) | 9176.0696  | 184.6   | -1  |
| 6 | 3 | 3 | 5 | 3 | 2 | (01) | 13428.0360 | -2.5    | -2  |
| 6 | 3 | 3 | 6 | 2 | 4 | (01) | 10746.9053 | 1936.7  | 2   |
| 6 | 3 | 4 | 5 | 3 | 3 | (01) | 13720.0752 | 485.9   | -4  |

|   |   |   |   |   |   |      |            |         |     |
|---|---|---|---|---|---|------|------------|---------|-----|
| 6 | 3 | 4 | 6 | 2 | 5 | (01) | 7681.7609  | -1110.2 | -1  |
| 6 | 4 | 2 | 5 | 4 | 1 | (01) | 13331.9696 | 14.1    | -2  |
| 6 | 4 | 2 | 6 | 3 | 3 | (01) | 14868.8207 | 1381    | 8   |
| 6 | 4 | 3 | 5 | 4 | 2 | (01) | 13400.8003 | 38.0    | 0   |
| 6 | 4 | 3 | 6 | 3 | 4 | (01) | 11421.3363 | -907.7  | -4  |
| 6 | 5 | 1 | 5 | 5 | 1 | (01) | 13290.3455 | 24.6    | 1   |
| 6 | 5 | 1 | 6 | 4 | 2 | (01) | 18827.9305 | 1634.2  | -14 |
| 7 | 0 | 7 | 6 | 0 | 6 | (01) | 13726.1399 | 28.9    | -2  |
| 7 | 0 | 7 | 6 | 1 | 6 | (01) | 13445.7054 | -34.6   | -1  |
| 7 | 1 | 6 | 6 | 1 | 5 | (01) | 15554.4749 | -4.8    | -1  |
| 7 | 1 | 6 | 6 | 2 | 5 | (01) | 13576.3559 | -236.6  | 2   |
| 7 | 1 | 6 | 7 | 0 | 7 | (01) | 9306.7180  | -19.5   | 0   |
| 7 | 1 | 7 | 6 | 0 | 6 | (01) | 13875.6188 | 46.7    | -2  |
| 7 | 1 | 7 | 6 | 1 | 6 | (01) | 13595.1839 | -17.3   | -2  |
| 7 | 2 | 5 | 6 | 2 | 4 | (01) | 15846.1848 | -774.0  | 3   |
| 7 | 2 | 6 | 6 | 1 | 5 | (01) | 17238.2364 | 262.3   | -3  |
| 7 | 2 | 6 | 6 | 2 | 5 | (01) | 15260.1168 | 29.8    | -1  |
| 7 | 2 | 6 | 7 | 0 | 7 | (01) | 10990.4793 | 247.4   | -2  |
| 7 | 2 | 6 | 7 | 1 | 7 | (01) | 10841.0015 | 230.7   | -1  |
| 7 | 3 | 4 | 6 | 3 | 3 | (01) | 15761.4873 | -43.9   | -1  |
| 7 | 3 | 4 | 7 | 2 | 5 | (01) | 10662.2088 | 2667.7  | -1  |
| 7 | 3 | 5 | 6 | 3 | 4 | (01) | 16206.4158 | 626.4   | -5  |
| 7 | 3 | 5 | 7 | 2 | 6 | (01) | 8628.0601  | -513.4  | -4  |
| 7 | 4 | 3 | 6 | 4 | 2 | (01) | 15602.2568 | 11.4    | -1  |
| 7 | 4 | 3 | 7 | 3 | 4 | (01) | 14709.5899 | 1436    | 8   |
| 7 | 4 | 4 | 6 | 4 | 3 | (01) | 15720.2781 | 74.6    | 0   |
| 7 | 4 | 4 | 7 | 3 | 5 | (01) | 10935.1956 | -1462.5 | -2  |
| 7 | 5 | 2 | 6 | 5 | 1 | (01) | 15535.6803 | 25.5    | 0   |
| 7 | 5 | 2 | 7 | 4 | 3 | (01) | 18761.3548 | 1649.1  | -12 |
| 7 | 5 | 3 | 6 | 5 | 2 | (01) | 15584.9521 | -3.5    | 1   |
| 7 | 5 | 3 | 7 | 4 | 4 | (01) | 15581.9214 | -22.7   | -2  |
| 7 | 6 | 1 | 6 | 6 | 1 | (01) | 15500.2014 | 40.9    | 2   |
| 8 | 0 | 8 | 7 | 0 | 7 | (01) | 15504.9212 | 2.1     | -2  |
| 8 | 0 | 8 | 7 | 1 | 7 | (01) | 15355.4425 | -15.4   | -2  |
| 8 | 1 | 7 | 7 | 1 | 6 | (01) | 17552.5631 | 130.0   | -2  |
| 8 | 1 | 7 | 7 | 2 | 6 | (01) | 15868.8011 | -137.6  | 0   |
| 8 | 1 | 7 | 8 | 0 | 8 | (01) | 11354.3604 | 108.9   | 1   |
| 8 | 1 | 8 | 7 | 0 | 7 | (01) | 15580.9988 | 0.3     | -2  |
| 8 | 1 | 8 | 7 | 1 | 7 | (01) | 15431.5202 | -17.2   | -2  |
| 8 | 2 | 6 | 7 | 2 | 5 | (01) | 18117.7315 | -631.5  | 2   |
| 8 | 2 | 7 | 7 | 1 | 6 | (01) | 18784.4023 | 304.5   | -3  |

|   |   |   |   |   |   |      |            |         |     |
|---|---|---|---|---|---|------|------------|---------|-----|
| 8 | 2 | 7 | 7 | 2 | 6 | (01) | 17100.6406 | 37.3    | -1  |
| 8 | 2 | 7 | 8 | 0 | 8 | (01) | 12586.1992 | 283.1   | -1  |
| 8 | 2 | 7 | 8 | 1 | 8 | (01) | 12510.1225 | 285.8   | 1   |
| 8 | 3 | 5 | 7 | 3 | 4 | (01) | 18134.2087 | -186.1  | 0   |
| 8 | 3 | 5 | 8 | 2 | 6 | (01) | 10678.6860 | 3113.2  | -3  |
| 8 | 3 | 6 | 7 | 3 | 5 | (01) | 18536.6552 | 410.4   | -2  |
| 8 | 3 | 6 | 8 | 1 | 7 | (01) | 11295.9177 | 38.1    | -3  |
| 8 | 3 | 6 | 8 | 2 | 7 | (01) | 10064.0755 | -139.5  | -5  |
| 8 | 4 | 4 | 7 | 4 | 3 | (01) | 17897.1329 | 1.9     | 0   |
| 8 | 4 | 4 | 8 | 3 | 5 | (01) | 14472.5143 | 1624.1  | 9   |
| 8 | 4 | 5 | 7 | 4 | 4 | (01) | 18101.9306 | 177.9   | -2  |
| 8 | 5 | 3 | 7 | 5 | 2 | (01) | 17795.4098 | 25.1    | 0   |
| 8 | 5 | 3 | 8 | 4 | 4 | (01) | 18659.6323 | 1672.9  | -11 |
| 8 | 5 | 4 | 7 | 5 | 3 | (01) | 17870.3063 | -5.5    | 0   |
| 8 | 5 | 4 | 8 | 4 | 5 | (01) | 15350.2983 | -204.9  | 1   |
| 8 | 6 | 2 | 7 | 6 | 1 | (01) | 17742.3753 | 45.8    | 2   |
| 8 | 6 | 3 | 7 | 6 | 2 | (01) | 17782.4733 | -40.0   | 1   |
| 8 | 7 | 1 | 7 | 7 | 1 | (01) | 17710.5208 | 71.3    | 4   |
| 9 | 0 | 9 | 8 | 0 | 8 | (01) | 17298.1908 | -17.1   | -2  |
| 9 | 0 | 9 | 8 | 1 | 8 | (01) | 17222.1130 | -15.4   | -2  |
| 9 | 1 | 8 | 8 | 1 | 7 | (01) | 19391.3445 | 177.7   | -1  |
| 9 | 1 | 8 | 8 | 2 | 7 | (01) | 18159.5050 | 2.9     | -1  |
| 9 | 1 | 9 | 8 | 0 | 8 | (01) | 17335.7220 | -24.1   | -2  |
| 9 | 1 | 9 | 8 | 1 | 8 | (01) | 17259.6442 | -22.5   | -2  |
| 9 | 2 | 7 | 8 | 2 | 6 | (01) | 20446.7697 | -331.6  | 0   |
| 9 | 2 | 8 | 8 | 1 | 7 | (01) | 20189.1925 | 236.3   | -1  |
| 9 | 2 | 8 | 8 | 2 | 7 | (01) | 18957.3530 | 61.5    | -1  |
| 9 | 3 | 6 | 9 | 2 | 7 | (01) | 10737.5671 | 2931.9  | -2  |
| 9 | 3 | 7 | 8 | 4 | 5 | (01) | 10113.1790 | 1882    | 1   |
| 9 | 3 | 7 | 9 | 1 | 8 | (01) | 12518.2222 | 46.4    | -4  |
| 9 | 4 | 5 | 8 | 4 | 4 | (01) | 20223.1492 | -20.0   | 0   |
| 9 | 4 | 5 | 9 | 3 | 6 | (01) | 14190.0124 | 2116.7  | 8   |
| 9 | 4 | 6 | 9 | 3 | 7 | (01) | 10464.9905 | -1478.8 | -3  |
| 9 | 5 | 4 | 8 | 5 | 3 | (01) | 20072.1413 | 22.7    | 1   |
| 9 | 5 | 4 | 9 | 4 | 5 | (01) | 18508.6244 | 1715.6  | -10 |
| 9 | 5 | 5 | 8 | 5 | 4 | (01) | 20183.0584 | -2.6    | 1   |
| 9 | 6 | 3 | 8 | 6 | 2 | (01) | 19995.9222 | 51.2    | 2   |
| 9 | 6 | 4 | 8 | 6 | 3 | (01) | 20053.3814 | -51.5   | 1   |
| 9 | 7 | 2 | 8 | 7 | 1 | (01) | 19950.5765 | 83.2    | 4   |
| 9 | 7 | 3 | 8 | 7 | 2 | (01) | 19985.3844 | -80.3   | 2   |
| 9 | 8 | 1 | 8 | 8 | 1 | (01) | 19921.0859 | 125.7   | 5   |

---

|    |   |    |    |   |    |      |            |         |     |
|----|---|----|----|---|----|------|------------|---------|-----|
| 10 | 0 | 10 | 9  | 0 | 9  | (01) | 19101.8513 | -31.4   | -2  |
| 10 | 0 | 10 | 9  | 1 | 9  | (01) | 19064.3203 | -24.2   | -2  |
| 10 | 1 | 10 | 9  | 0 | 9  | (01) | 19119.9520 | -38.5   | -2  |
| 10 | 1 | 10 | 9  | 1 | 9  | (01) | 19082.4206 | -31.7   | -2  |
| 10 | 2 | 8  | 10 | 1 | 9  | (01) | 11165.4536 | 8.8     | -4  |
| 10 | 3 | 7  | 10 | 2 | 8  | (01) | 10819.2923 | 2134.2  | -1  |
| 10 | 4 | 6  | 10 | 3 | 7  | (01) | 13958.3991 | 2886.5  | 6   |
| 10 | 4 | 7  | 10 | 3 | 8  | (01) | 11082.3083 | -1010.3 | -7  |
| 11 | 2 | 9  | 11 | 2 | 10 | (01) | 12903.9358 | 89.3    | -11 |
| 2  | 0 | 2  | 1  | 0 | 1  | (11) | 4030.2113  | -30.8   | 3   |
| 2  | 2 | 0  | 2  | 2 | 1  | (11) | 11133.4091 | -207.9  | 7   |
| 2  | 2 | 1  | 2  | 1 | 1  | (11) | 7218.5171  | -133.8  | -1  |
| 3  | 0 | 3  | 2  | 0 | 2  | (11) | 6240.9617  | -1.0    | 0   |
| 3  | 1 | 2  | 2  | 1 | 1  | (11) | 6751.7004  | -28.2   | 1   |
| 3  | 1 | 2  | 2  | 1 | 2  | (11) | 9672.4972  | -75.6   | -8  |
| 3  | 1 | 3  | 2  | 0 | 2  | (11) | 7274.0238  | -2.2    | 0   |
| 3  | 1 | 3  | 2  | 1 | 2  | (11) | 6246.5795  | -41.0   | 0   |
| 3  | 2 | 2  | 2  | 0 | 2  | (11) | 12089.3519 | 41.1    | -3  |
| 3  | 2 | 2  | 2  | 1 | 2  | (11) | 11061.9139 | 8.7     | 3   |
| 3  | 3 | 1  | 3  | 2 | 1  | (11) | 11094.6673 | -211.6  | 6   |
| 4  | 0 | 4  | 3  | 0 | 3  | (11) | 8280.9653  | 14.3    | -1  |
| 4  | 1 | 3  | 3  | 1 | 2  | (11) | 8902.3401  | -38.3   | 3   |
| 4  | 1 | 3  | 3  | 1 | 3  | (11) | 12328.2582 | -72.5   | -5  |
| 4  | 1 | 4  | 3  | 0 | 3  | (11) | 9077.4079  | -33.3   | -2  |
| 4  | 1 | 4  | 3  | 1 | 3  | (11) | 8044.3469  | -31.0   | -1  |
| 4  | 2 | 2  | 3  | 2 | 1  | (11) | 8967.5015  | -20.4   | -2  |
| 4  | 2 | 3  | 3  | 1 | 2  | (11) | 10647.1923 | 42.1    | 5   |
| 4  | 2 | 3  | 3  | 2 | 2  | (11) | 9257.7767  | -41.0   | -5  |
| 4  | 3 | 1  | 3  | 3 | 1  | (11) | 8875.5515  | -21.9   | -1  |
| 4  | 3 | 1  | 4  | 2 | 2  | (11) | 11002.7201 | -210.3  | 9   |
| 4  | 3 | 2  | 4  | 2 | 3  | (11) | 7625.1721  | 77.4    | 1   |
| 4  | 4 | 1  | 4  | 3 | 1  | (11) | 14953.3922 | -217.7  | 6   |
| 5  | 0 | 5  | 4  | 0 | 4  | (11) | 10169.1042 | 10.5    | -2  |
| 5  | 0 | 5  | 4  | 1 | 4  | (11) | 9372.6618  | 58.3    | -1  |
| 5  | 1 | 4  | 4  | 1 | 3  | (11) | 11118.8947 | -6.6    | -2  |
| 5  | 1 | 5  | 4  | 0 | 4  | (11) | 10684.0839 | -61.7   | -2  |
| 5  | 1 | 5  | 4  | 1 | 4  | (11) | 9887.6405  | -14.9   | -2  |
| 5  | 2 | 3  | 4  | 2 | 2  | (11) | 11302.3192 | -35.7   | -2  |
| 5  | 2 | 4  | 4  | 1 | 3  | (11) | 13187.4573 | 0.3     | 1   |
| 5  | 2 | 4  | 4  | 2 | 3  | (11) | 11442.6012 | -84.0   | -4  |
| 5  | 2 | 4  | 5  | 1 | 5  | (11) | 7583.7268  | -27.6   | -2  |

---



|   |   |   |   |   |   |      |            |        |     |
|---|---|---|---|---|---|------|------------|--------|-----|
| 5 | 3 | 2 | 4 | 3 | 1 | (11) | 11137.6404 | -28.0  | 0   |
| 5 | 3 | 2 | 5 | 2 | 3 | (11) | 10838.0364 | -207.5 | 5   |
| 5 | 3 | 3 | 4 | 3 | 2 | (11) | 11274.3087 | -42.0  | -1  |
| 5 | 3 | 3 | 5 | 2 | 4 | (11) | 7456.8727  | 112.5  | -2  |
| 5 | 4 | 1 | 4 | 4 | 1 | (11) | 11081.7131 | -28.1  | -1  |
| 5 | 4 | 1 | 5 | 3 | 2 | (11) | 14897.4672 | -215.4 | 7   |
| 5 | 4 | 2 | 5 | 3 | 3 | (11) | 11788.7492 | 171.2  | -12 |
| 5 | 5 | 1 | 4 | 4 | 0 | (11) | 11056.7834 | -26.3  | -2  |
| 6 | 0 | 6 | 5 | 0 | 5 | (11) | 11961.8219 | -3.4   | -3  |
| 6 | 0 | 6 | 5 | 1 | 5 | (11) | 11446.8250 | 51.5   | -20 |
| 6 | 1 | 5 | 5 | 1 | 4 | (11) | 13376.8741 | 42.3   | -2  |
| 6 | 1 | 5 | 5 | 2 | 4 | (11) | 11308.3155 | 39.4   | -1  |
| 6 | 1 | 6 | 5 | 0 | 5 | (11) | 12257.9357 | -76.1  | -2  |
| 6 | 1 | 6 | 5 | 1 | 5 | (11) | 11742.9563 | -3.6   | -1  |
| 6 | 2 | 4 | 5 | 2 | 3 | (11) | 13616.7654 | -52.1  | 0   |
| 6 | 2 | 4 | 5 | 3 | 3 | (11) | 11482.5822 | -296.8 | -4  |
| 6 | 2 | 5 | 5 | 1 | 4 | (11) | 15458.1553 | -80.3  | -1  |
| 6 | 2 | 5 | 5 | 2 | 4 | (11) | 13389.6008 | -79.1  | 4   |
| 6 | 2 | 5 | 6 | 1 | 6 | (11) | 9230.3665  | -108.0 | -1  |
| 6 | 3 | 3 | 5 | 3 | 2 | (11) | 13432.1496 | -39.3  | -2  |
| 6 | 3 | 3 | 6 | 2 | 4 | (11) | 10653.4193 | -196   | 2   |
| 6 | 3 | 4 | 5 | 3 | 3 | (11) | 13712.1864 | -78.5  | -4  |
| 6 | 3 | 4 | 6 | 2 | 5 | (11) | 7779.4645  | 119.3  | -3  |
| 6 | 4 | 2 | 5 | 4 | 1 | (11) | 13332.7233 | -36.8  | -3  |
| 6 | 4 | 2 | 6 | 3 | 3 | (11) | 14798.0428 | -211.1 | 8   |
| 6 | 4 | 3 | 5 | 4 | 2 | (11) | 13399.8569 | -61.9  | 0   |
| 6 | 4 | 3 | 6 | 3 | 4 | (11) | 11476.4205 | 188.6  | -7  |
| 6 | 5 | 1 | 5 | 5 | 1 | (11) | 13290.1197 | -30.8  | -1  |
| 6 | 5 | 1 | 6 | 4 | 2 | (11) | 18759.9463 | -33.2  | -12 |
| 6 | 5 | 2 | 6 | 4 | 3 | (11) | 15762.3567 | 291.2  | -10 |
| 7 | 0 | 7 | 6 | 0 | 6 | (11) | 13729.5214 | -13.1  | -2  |
| 7 | 0 | 7 | 6 | 1 | 6 | (11) | 13433.4085 | 60.4   | -2  |
| 7 | 1 | 6 | 6 | 1 | 5 | (11) | 15547.8710 | 70.5   | -3  |
| 7 | 1 | 6 | 6 | 2 | 5 | (11) | 13466.5910 | 194.3  | -2  |
| 7 | 1 | 6 | 7 | 0 | 7 | (11) | 9263.5499  | 26.7   | -1  |
| 7 | 1 | 7 | 6 | 0 | 6 | (11) | 13887.6499 | -72.7  | -1  |
| 7 | 1 | 7 | 6 | 1 | 6 | (11) | 13591.5369 | 0.7    | -2  |
| 7 | 2 | 5 | 6 | 2 | 4 | (11) | 15858.3828 | -30.0  | 2   |
| 7 | 2 | 6 | 6 | 1 | 5 | (11) | 17316.7160 | -162.8 | 5   |
| 7 | 2 | 6 | 6 | 2 | 5 | (11) | 15235.4293 | -45.7  | -1  |
| 7 | 2 | 6 | 7 | 0 | 7 | (11) | 11032.3915 | -210.0 | 4   |

|   |   |   |   |   |   |      |            |        |     |
|---|---|---|---|---|---|------|------------|--------|-----|
| 7 | 2 | 6 | 7 | 1 | 7 | (11) | 10874.2598 | -153.5 | 0   |
| 7 | 3 | 4 | 6 | 3 | 3 | (11) | 15769.2618 | -56.7  | -3  |
| 7 | 3 | 4 | 7 | 2 | 5 | (11) | 10564.2991 | -221.8 | -2  |
| 7 | 3 | 5 | 6 | 3 | 4 | (11) | 16190.0867 | -143.9 | -3  |
| 7 | 3 | 5 | 7 | 2 | 6 | (11) | 8734.1225  | 21.8   | -5  |
| 7 | 4 | 3 | 6 | 4 | 2 | (11) | 15603.7157 | -44.4  | -2  |
| 7 | 4 | 3 | 7 | 3 | 4 | (11) | 14632.4952 | -200.4 | 7   |
| 7 | 4 | 4 | 6 | 4 | 3 | (11) | 15718.6593 | -84.6  | 1   |
| 7 | 4 | 4 | 7 | 3 | 5 | (11) | 11004.9955 | 250.4  | 0   |
| 7 | 5 | 2 | 6 | 5 | 1 | (11) | 15535.6447 | -35.5  | 0   |
| 7 | 5 | 2 | 7 | 4 | 3 | (11) | 18691.8736 | -26.0  | -12 |
| 7 | 5 | 3 | 6 | 5 | 2 | (11) | 15583.3577 | -86.1  | 2   |
| 7 | 5 | 3 | 7 | 4 | 4 | (11) | 15627.0597 | 294.2  | -5  |
| 7 | 6 | 1 | 6 | 6 | 1 | (11) | 15499.5538 | -26.7  | 0   |
| 8 | 0 | 8 | 7 | 0 | 7 | (11) | 15506.8921 | -16.8  | -2  |
| 8 | 0 | 8 | 7 | 1 | 7 | (11) | 15348.7633 | 42.6   | -2  |
| 8 | 1 | 7 | 7 | 1 | 6 | (11) | 17553.8674 | 65.1   | -2  |
| 8 | 1 | 7 | 7 | 2 | 6 | (11) | 15785.0282 | 304.2  | -4  |
| 8 | 1 | 7 | 8 | 0 | 8 | (11) | 11310.5246 | 108.0  | -2  |
| 8 | 1 | 7 | 8 | 1 | 8 | (11) | 11229.9421 | 149.5  | -3  |
| 8 | 1 | 8 | 7 | 0 | 7 | (11) | 15587.4735 | -59.4  | -1  |
| 8 | 1 | 8 | 7 | 1 | 7 | (11) | 15429.3449 | 0.2    | -2  |
| 8 | 2 | 6 | 7 | 2 | 5 | (11) | 18114.7919 | 38     | 1   |
| 8 | 2 | 7 | 7 | 1 | 6 | (11) | 18849.9823 | -239.2 | 2   |
| 8 | 2 | 7 | 7 | 2 | 6 | (11) | 17081.1437 | 0.5    | 0   |
| 8 | 2 | 7 | 8 | 0 | 8 | (11) | 12606.6395 | -196.3 | 2   |
| 8 | 2 | 7 | 8 | 1 | 8 | (11) | 12526.0583 | -153.5 | 2   |
| 8 | 3 | 5 | 7 | 3 | 4 | (11) | 18148.1383 | -80.5  | -2  |
| 8 | 3 | 5 | 8 | 2 | 6 | (11) | 10597.6454 | -340.3 | -5  |
| 8 | 3 | 6 | 7 | 3 | 5 | (11) | 18513.1185 | -185.5 | -1  |
| 8 | 3 | 6 | 8 | 1 | 7 | (11) | 11462.2106 | -470.2 | -4  |
| 8 | 3 | 6 | 8 | 2 | 7 | (11) | 10166.0975 | -164.1 | -6  |
| 8 | 4 | 4 | 7 | 4 | 3 | (11) | 17899.7478 | -57.1  | -2  |
| 8 | 4 | 4 | 8 | 3 | 5 | (11) | 14384.1053 | -176.4 | 8   |
| 8 | 4 | 5 | 7 | 4 | 4 | (11) | 18098.3003 | -125.3 | 0   |
| 8 | 5 | 3 | 7 | 5 | 2 | (11) | 17795.6908 | -43.3  | -2  |
| 8 | 5 | 3 | 8 | 4 | 4 | (11) | 18587.8142 | -14.5  | -14 |
| 8 | 5 | 4 | 7 | 5 | 3 | (11) | 17868.2721 | -110.7 | 2   |
| 8 | 5 | 4 | 8 | 4 | 5 | (11) | 15397.0447 | 322    | 10  |
| 8 | 6 | 2 | 7 | 6 | 1 | (11) | 17741.7928 | -29.3  | -1  |
| 8 | 6 | 3 | 7 | 6 | 2 | (11) | 17780.3534 | -115.5 | 5   |

|    |   |    |    |   |   |      |            |        |     |
|----|---|----|----|---|---|------|------------|--------|-----|
| 8  | 7 | 1  | 7  | 7 | 1 | (11) | 17709.5255 | -9.3   | 1   |
| 9  | 0 | 9  | 8  | 0 | 8 | (11) | 17299.1063 | -17.9  | -2  |
| 9  | 0 | 9  | 8  | 1 | 8 | (11) | 17218.5250 | 24.8   | -2  |
| 9  | 1 | 8  | 8  | 1 | 7 | (11) | 19398.1764 | 33.8   | -1  |
| 9  | 1 | 9  | 8  | 0 | 8 | (11) | 17338.8955 | -45.2  | -1  |
| 9  | 1 | 9  | 8  | 1 | 8 | (11) | 17258.3140 | -2.7   | -1  |
| 9  | 2 | 7  | 8  | 2 | 6 | (11) | 20433.5486 | 120.1  | -2  |
| 9  | 2 | 8  | 8  | 1 | 7 | (11) | 20239.8465 | -268.8 | 3   |
| 9  | 2 | 8  | 8  | 2 | 7 | (11) | 18943.7316 | 35.5   | 0   |
| 9  | 3 | 6  | 8  | 3 | 5 | (11) | 20526.2233 | -88.9  | 0   |
| 9  | 3 | 6  | 9  | 2 | 7 | (11) | 10690.3184 | -551.1 | -4  |
| 9  | 3 | 7  | 8  | 3 | 6 | (11) | 20582.3820 | -150   | 2   |
| 9  | 3 | 7  | 9  | 1 | 8 | (11) | 12646.4173 | -652.9 | 0   |
| 9  | 3 | 7  | 9  | 2 | 8 | (11) | 11804.7482 | -349.3 | -4  |
| 9  | 4 | 5  | 8  | 4 | 4 | (11) | 20227.7420 | -75.6  | -2  |
| 9  | 4 | 5  | 9  | 3 | 6 | (11) | 14085.6236 | -163.5 | 5   |
| 9  | 4 | 6  | 8  | 4 | 5 | (11) | 20568.8215 | -205.8 | -1  |
| 9  | 5 | 4  | 8  | 5 | 3 | (11) | 20072.9175 | -51.2  | -1  |
| 9  | 5 | 4  | 9  | 4 | 5 | (11) | 18432.9901 | 10.3   | -13 |
| 9  | 5 | 5  | 8  | 5 | 4 | (11) | 20180.4949 | -143.6 | 3   |
| 9  | 5 | 5  | 9  | 4 | 6 | (11) | 15008.7026 | 368.7  | -2  |
| 9  | 6 | 3  | 8  | 6 | 2 | (11) | 19995.4782 | -31.2  | -1  |
| 9  | 6 | 4  | 8  | 6 | 3 | (11) | 20050.8178 | -144.7 | 5   |
| 9  | 7 | 2  | 8  | 7 | 1 | (11) | 19949.5737 | -5.8   | 1   |
| 9  | 7 | 3  | 8  | 7 | 2 | (11) | 19982.8044 | -156.5 | 6   |
| 9  | 8 | 1  | 8  | 8 | 1 | (11) | 19919.7922 | 31.2   | 2   |
| 10 | 0 | 10 | 9  | 0 | 9 | (11) | 19102.1342 | -18    | -1  |
| 10 | 0 | 10 | 9  | 1 | 9 | (11) | 19062.3449 | 9.2    | -2  |
| 10 | 1 | 9  | 9  | 1 | 8 | (11) | 21149.9120 | 9      | 1   |
| 10 | 1 | 10 | 9  | 0 | 9 | (11) | 19121.3364 | -35.7  | -1  |
| 10 | 1 | 10 | 9  | 1 | 9 | (11) | 19081.5480 | -7.6   | -1  |
| 10 | 2 | 8  | 9  | 2 | 7 | (11) | 22725.5075 | 176    | -3  |
| 10 | 2 | 8  | 10 | 1 | 9 | (11) | 11113.5388 | -102.7 | -6  |
| 10 | 2 | 9  | 9  | 1 | 8 | (11) | 21649.6977 | -243.9 | 5   |
| 10 | 2 | 9  | 9  | 2 | 8 | (11) | 20808.0271 | 58.2   | 0   |
| 10 | 3 | 7  | 9  | 3 | 6 | (11) | 22839.4135 | -32.4  | 1   |
| 10 | 3 | 7  | 10 | 2 | 8 | (11) | 10804.2242 | -759.7 | 0   |
| 10 | 3 | 8  | 9  | 3 | 7 | (11) | 22476.0334 | -56.1  | 3   |
| 10 | 4 | 6  | 9  | 4 | 5 | (11) | 22596.1620 | -106.7 | -3  |
| 10 | 4 | 6  | 10 | 3 | 7 | (11) | 13842.3728 | -237.1 | 2   |
| 10 | 4 | 7  | 9  | 4 | 6 | (11) | 23109.0971 | -326.3 | -2  |

---

|    |   |    |    |   |    |      |            |         |     |
|----|---|----|----|---|----|------|------------|---------|-----|
| 10 | 4 | 7  | 10 | 3 | 8  | (11) | 11209.6784 | -17.5   | -9  |
| 10 | 5 | 5  | 9  | 5 | 4  | (11) | 22370.5473 | -63.9   | -2  |
| 10 | 5 | 6  | 9  | 5 | 5  | (11) | 22529.6143 | -172.5  | 21  |
| 10 | 6 | 4  | 9  | 6 | 3  | (11) | 22262.2899 | -49.2   | -16 |
| 10 | 6 | 5  | 9  | 6 | 4  | (11) | 22339.4428 | -180.7  | 5   |
| 11 | 0 | 11 | 10 | 0 | 10 | (11) | 20911.6578 | -20.7   | -1  |
| 11 | 0 | 11 | 10 | 1 | 10 | (11) | 20892.4554 | -3.2    | -1  |
| 11 | 1 | 11 | 10 | 0 | 10 | (11) | 20920.7650 | -30.5   | -1  |
| 11 | 1 | 11 | 10 | 1 | 10 | (11) | 20901.5626 | -13     | -1  |
| 11 | 2 | 9  | 10 | 2 | 8  | (11) | 24875.5027 | 176     | -2  |
| 11 | 2 | 10 | 10 | 1 | 9  | (11) | 23162.2892 | -180.7  | 6   |
| 11 | 2 | 10 | 10 | 2 | 9  | (11) | 22662.5033 | 72.1    | 1   |
| 12 | 0 | 12 | 11 | 0 | 11 | (11) | 22724.8226 | -21.6   | 2   |
| 12 | 0 | 12 | 11 | 1 | 11 | (11) | 22715.7077 | -19.5   | -6  |
| 12 | 1 | 11 | 11 | 1 | 10 | (11) | 24633.9727 | 22.4    | 4   |
| 12 | 1 | 12 | 11 | 0 | 11 | (11) | 22729.0774 | -31.7   | -2  |
| 12 | 1 | 12 | 11 | 1 | 11 | (11) | 22719.9691 | -23     | -4  |
| 2  | 0 | 2  | 1  | 0 | 1  | (12) | 4045.2186  | 139     | 3   |
| 2  | 1 | 2  | 1  | 0 | 1  | (12) | 4954.8825  | 451.2   | 4   |
| 2  | 2 | 0  | 2  | 2 | 1  | (12) | 11239.5747 | -1355.8 | 7   |
| 2  | 2 | 1  | 1  | 1 | 1  | (12) | 11820.9796 | -1064.7 | 0   |
| 2  | 2 | 1  | 2  | 1 | 1  | (12) | 7336.3656  | -1119.4 | 2   |
| 3  | 0 | 3  | 2  | 0 | 2  | (12) | 6257.4435  | 22.1    | 0   |
| 3  | 1 | 2  | 2  | 1 | 1  | (12) | 6725.5077  | 216.9   | 2   |
| 3  | 1 | 2  | 2  | 1 | 2  | (12) | 9824.9864  | -982.2  | -8  |
| 3  | 1 | 3  | 2  | 0 | 2  | (12) | 7187.4211  | 168.3   | -1  |
| 3  | 1 | 3  | 2  | 1 | 2  | (12) | 6277.7581  | -143    | -1  |
| 3  | 2 | 1  | 3  | 1 | 3  | (12) | 10826.7997 | -2149.5 | -5  |
| 3  | 2 | 2  | 2  | 0 | 2  | (12) | 11850.1845 | 936.5   | 4   |
| 3  | 2 | 2  | 2  | 1 | 2  | (12) | 10940.5207 | 624.4   | 3   |
| 3  | 3 | 1  | 3  | 2 | 1  | (12) | 11205.2103 | -1368.3 | 7   |
| 4  | 0 | 4  | 3  | 0 | 3  | (12) | 8284.8980  | 16.5    | -1  |
| 4  | 1 | 3  | 3  | 1 | 2  | (12) | 8892.6781  | 265     | 3   |
| 4  | 1 | 3  | 3  | 1 | 3  | (12) | 12439.9054 | -575.1  | -5  |
| 4  | 1 | 4  | 3  | 0 | 3  | (12) | 9002.2985  | 40.7    | -3  |
| 4  | 1 | 4  | 3  | 1 | 3  | (12) | 8072.3210  | -105.3  | -2  |
| 4  | 2 | 2  | 3  | 2 | 1  | (12) | 8953.1537  | 53.7    | -1  |
| 4  | 2 | 2  | 4  | 1 | 4  | (12) | 11707.6249 | -1998   | -11 |
| 4  | 2 | 3  | 3  | 1 | 2  | (12) | 10390.6645 | 1319.8  | 7   |
| 4  | 2 | 3  | 3  | 1 | 3  | (12) | 13937.8949 | 482.7   | 2   |
| 4  | 2 | 3  | 3  | 2 | 2  | (12) | 9275.1308  | -286.2  | -3  |

---

|   |   |   |   |   |   |      |            |         |    |
|---|---|---|---|---|---|------|------------|---------|----|
| 4 | 3 | 1 | 3 | 3 | 1 | (12) | 8871.0839  | 17.5    | 0  |
| 4 | 3 | 1 | 4 | 2 | 2 | (12) | 11123.1374 | -1407.6 | 5  |
| 4 | 3 | 2 | 4 | 2 | 3 | (12) | 7495.9560  | 968.3   | 4  |
| 4 | 4 | 1 | 4 | 3 | 1 | (12) | 15061.0277 | -1598   | 6  |
| 5 | 0 | 5 | 4 | 0 | 4 | (12) | 10162.1993 | 3.6     | -2 |
| 5 | 0 | 5 | 4 | 1 | 4 | (12) | 9444.7989  | -20.5   | 0  |
| 5 | 1 | 4 | 4 | 1 | 3 | (12) | 11134.6297 | 169.5   | 3  |
| 5 | 1 | 4 | 4 | 2 | 3 | (12) | 9636.6395  | -889.1  | -6 |
| 5 | 1 | 5 | 4 | 0 | 4 | (12) | 10623.7025 | -36.4   | -3 |
| 5 | 1 | 5 | 4 | 1 | 4 | (12) | 9906.3014  | -61.2   | -2 |
| 5 | 2 | 3 | 4 | 2 | 2 | (12) | 11275.8223 | 153.5   | 15 |
| 5 | 2 | 4 | 4 | 1 | 3 | (12) | 12969.8931 | 788.5   | 3  |
| 5 | 2 | 4 | 4 | 2 | 3 | (12) | 11471.9045 | -268.4  | -4 |
| 5 | 2 | 4 | 5 | 1 | 5 | (12) | 7431.1774  | 381.2   | 3  |
| 5 | 3 | 2 | 4 | 3 | 1 | (12) | 11130.5437 | 29.2    | 1  |
| 5 | 3 | 2 | 5 | 2 | 3 | (12) | 10977.8737 | -1517   | 6  |
| 5 | 3 | 3 | 4 | 3 | 2 | (12) | 11273.6697 | -97.8   | -1 |
| 5 | 3 | 3 | 5 | 2 | 4 | (12) | 7297.7203  | 1138    | 5  |
| 5 | 4 | 1 | 4 | 4 | 1 | (12) | 11078.3176 | 19.1    | 0  |
| 5 | 4 | 1 | 5 | 3 | 2 | (12) | 15008.8022 | -1607.5 | 6  |
| 5 | 5 | 1 | 4 | 4 | 0 | (12) | 11054.6906 | 22.4    | 3  |
| 6 | 0 | 6 | 5 | 0 | 5 | (12) | 11951.6386 | -14.3   | -3 |
| 6 | 0 | 6 | 5 | 1 | 5 | (12) | 11490.1360 | 26.3    | -1 |
| 6 | 1 | 5 | 5 | 1 | 4 | (12) | 13397.9192 | 123.8   | 1  |
| 6 | 1 | 5 | 5 | 2 | 4 | (12) | 11562.6528 | -498.3  | -2 |
| 6 | 1 | 6 | 5 | 0 | 5 | (12) | 12215.6480 | -72.9   | -3 |
| 6 | 1 | 6 | 5 | 1 | 5 | (12) | 11754.1450 | -32.7   | -2 |
| 6 | 2 | 4 | 5 | 2 | 3 | (12) | 13580.4694 | 306.6   | 1  |
| 6 | 2 | 5 | 5 | 1 | 4 | (12) | 15268.5706 | 372.6   | 0  |
| 6 | 2 | 5 | 5 | 2 | 4 | (12) | 13433.3053 | -248.4  | -2 |
| 6 | 2 | 5 | 6 | 1 | 6 | (12) | 9110.3338  | 161.6   | -1 |
| 6 | 3 | 3 | 5 | 3 | 2 | (12) | 13420.6806 | 43.6    | -1 |
| 6 | 3 | 3 | 6 | 2 | 4 | (12) | 10818.0850 | -1780   | 5  |
| 6 | 3 | 4 | 5 | 3 | 3 | (12) | 13721.9346 | -283.6  | -3 |
| 6 | 3 | 4 | 6 | 2 | 5 | (12) | 7586.3493  | 1102.5  | 4  |
| 6 | 4 | 2 | 5 | 4 | 1 | (12) | 13327.8872 | 22.2    | -3 |
| 6 | 4 | 2 | 6 | 3 | 3 | (12) | 14916.0131 | -1624.5 | 8  |
| 6 | 4 | 3 | 6 | 3 | 4 | (12) | 11361.6315 | 912.3   | -2 |
| 6 | 5 | 1 | 5 | 5 | 1 | (12) | 13287.2717 | 26.8    | 1  |
| 6 | 5 | 2 | 6 | 4 | 3 | (12) | 15660.0785 | 716.3   | 0  |
| 7 | 0 | 7 | 6 | 0 | 6 | (12) | 13721.3487 | -25.3   | -2 |

---

|   |   |   |   |   |   |      |            |         |     |
|---|---|---|---|---|---|------|------------|---------|-----|
| 7 | 0 | 7 | 6 | 1 | 6 | (12) | 13457.3397 | 33.7    | -1  |
| 7 | 1 | 6 | 6 | 1 | 5 | (12) | 15557.4365 | 98.8    | -1  |
| 7 | 1 | 6 | 6 | 2 | 5 | (12) | 13686.8065 | -128.6  | 21  |
| 7 | 1 | 6 | 7 | 0 | 7 | (12) | 9339.7813  | -19.9   | 2   |
| 7 | 1 | 7 | 6 | 0 | 6 | (12) | 13861.8263 | -79     | -3  |
| 7 | 1 | 7 | 6 | 1 | 6 | (12) | 13597.8172 | -20.1   | -2  |
| 7 | 2 | 5 | 6 | 2 | 4 | (12) | 15833.6357 | 410.5   | 1   |
| 7 | 2 | 6 | 6 | 1 | 5 | (12) | 17151.5198 | 59.2    | -1  |
| 7 | 2 | 6 | 6 | 2 | 5 | (12) | 15280.8671 | -190.9  | -2  |
| 7 | 2 | 6 | 7 | 0 | 7 | (12) | 10933.8625 | -61.7   | 0   |
| 7 | 2 | 6 | 7 | 1 | 7 | (12) | 10793.3866 | -6.2    | 2   |
| 7 | 3 | 4 | 6 | 3 | 3 | (12) | 15750.1112 | 77      | -1  |
| 7 | 3 | 4 | 7 | 2 | 5 | (12) | 10734.5604 | -2113.7 | 3   |
| 7 | 3 | 5 | 6 | 3 | 4 | (12) | 16214.1344 | -455.9  | -6  |
| 7 | 3 | 5 | 7 | 2 | 6 | (12) | 8519.6206  | 841.5   | 3   |
| 7 | 4 | 3 | 6 | 4 | 2 | (12) | 15596.8821 | 34.6    | 0   |
| 7 | 4 | 3 | 7 | 3 | 4 | (12) | 14762.7837 | -1667.2 | 8   |
| 7 | 4 | 4 | 6 | 4 | 3 | (12) | 15717.0920 | -91.4   | -1  |
| 7 | 4 | 4 | 7 | 3 | 5 | (12) | 10864.5881 | 1275.8  | 2   |
| 7 | 5 | 2 | 6 | 5 | 1 | (12) | 15531.8371 | 34.6    | 2   |
| 7 | 5 | 2 | 7 | 4 | 3 | (12) | 18802.8377 | -1682.2 | -15 |
| 7 | 5 | 3 | 6 | 5 | 2 | (12) | 15582.3177 | -75.8   | -1  |
| 7 | 5 | 3 | 7 | 4 | 4 | (12) | 15525.3065 | 734.1   | 3   |
| 7 | 6 | 1 | 6 | 6 | 1 | (12) | 15497.0083 | 43      | 2   |
| 8 | 0 | 8 | 7 | 0 | 7 | (12) | 15501.7025 | -29.7   | -2  |
| 8 | 0 | 8 | 7 | 1 | 7 | (12) | 15361.2245 | 23.6    | -2  |
| 8 | 1 | 7 | 7 | 1 | 6 | (12) | 17546.7374 | 59.7    | -1  |
| 8 | 1 | 7 | 7 | 2 | 6 | (12) | 15952.6544 | 99.6    | -1  |
| 8 | 1 | 7 | 8 | 0 | 8 | (12) | 11384.8160 | 69.2    | 3   |
| 8 | 1 | 7 | 8 | 1 | 8 | (12) | 11313.3999 | 109.2   | 3   |
| 8 | 1 | 8 | 7 | 0 | 7 | (12) | 15573.1184 | -69.9   | -3  |
| 8 | 1 | 8 | 7 | 1 | 7 | (12) | 15432.6408 | -16.2   | -2  |
| 8 | 2 | 6 | 7 | 2 | 5 | (12) | 18119.7581 | 357.8   | 0   |
| 8 | 2 | 7 | 7 | 1 | 6 | (12) | 18710.9023 | -148.7  | -1  |
| 8 | 2 | 7 | 7 | 2 | 6 | (12) | 17116.8192 | -108.9  | -1  |
| 8 | 2 | 7 | 8 | 0 | 8 | (12) | 12548.9809 | -139.2  | 3   |
| 8 | 2 | 7 | 8 | 1 | 8 | (12) | 12477.5650 | -99     | 3   |
| 8 | 3 | 5 | 7 | 3 | 4 | (12) | 18116.6876 | 158     | 0   |
| 8 | 3 | 5 | 8 | 2 | 6 | (12) | 10731.4894 | -2314   | 2   |
| 8 | 3 | 6 | 7 | 3 | 5 | (12) | 18550.6845 | -459.6  | -2  |
| 8 | 3 | 6 | 8 | 1 | 7 | (12) | 11117.6480 | 279.6   | -1  |

---

|    |   |    |   |   |   |      |            |         |     |
|----|---|----|---|---|---|------|------------|---------|-----|
| 8  | 3 | 6  | 8 | 2 | 7 | (12) | 9953.4859  | 490.8   | 2   |
| 8  | 4 | 4  | 7 | 4 | 3 | (12) | 17890.0091 | 45.1    | 1   |
| 8  | 4 | 4  | 8 | 3 | 5 | (12) | 14536.1049 | -1780.4 | 9   |
| 8  | 4 | 5  | 7 | 4 | 4 | (12) | 18099.3971 | -183    | -1  |
| 8  | 4 | 5  | 8 | 3 | 6 | (12) | 10413.2987 | 1550.4  | 1   |
| 8  | 5 | 3  | 7 | 5 | 2 | (12) | 17790.6523 | 42.5    | 1   |
| 8  | 5 | 3  | 8 | 4 | 4 | (12) | 18703.4809 | -1684.8 | -15 |
| 8  | 5 | 4  | 7 | 5 | 3 | (12) | 17867.3510 | -99.8   | 0   |
| 8  | 5 | 4  | 8 | 4 | 5 | (12) | 15293.2611 | 818     | 5   |
| 8  | 6 | 2  | 7 | 6 | 1 | (12) | 17738.5385 | 55.3    | 4   |
| 8  | 6 | 3  | 7 | 6 | 2 | (12) | 17779.8930 | -105.5  | 2   |
| 8  | 7 | 1  | 7 | 7 | 1 | (12) | 17707.1465 | 76.6    | 6   |
| 9  | 0 | 9  | 8 | 0 | 8 | (12) | 17296.1177 | -30.4   | -2  |
| 9  | 0 | 9  | 8 | 1 | 8 | (12) | 17224.7016 | 9.6     | -2  |
| 9  | 1 | 8  | 8 | 1 | 7 | (12) | 19379.9141 | 9.1     | -2  |
| 9  | 1 | 8  | 8 | 2 | 7 | (12) | 18215.7510 | 219.3   | 0   |
| 9  | 1 | 9  | 8 | 0 | 8 | (12) | 17331.3221 | -57.7   | -3  |
| 9  | 1 | 9  | 8 | 1 | 8 | (12) | 17259.9061 | -17.6   | -2  |
| 9  | 2 | 7  | 8 | 2 | 6 | (12) | 20457.0218 | 299.8   | -1  |
| 9  | 2 | 8  | 8 | 1 | 7 | (12) | 20131.9390 | -249.8  | -1  |
| 9  | 2 | 8  | 8 | 2 | 7 | (12) | 18967.7748 | -40.7   | 0   |
| 9  | 3 | 6  | 8 | 3 | 5 | (12) | 20482.0512 | 338.9   | -1  |
| 9  | 3 | 6  | 9 | 2 | 7 | (12) | 10756.5196 | -2274.1 | 3   |
| 9  | 3 | 7  | 8 | 3 | 6 | (12) | 20636.3224 | -395.3  | -1  |
| 9  | 3 | 7  | 9 | 2 | 8 | (12) | 11622.0329 | 135.6   | 1   |
| 9  | 4 | 5  | 8 | 4 | 4 | (12) | 20213.4847 | 58.2    | 0   |
| 9  | 4 | 5  | 9 | 3 | 6 | (12) | 14267.5373 | -2062.2 | 9   |
| 9  | 4 | 6  | 8 | 4 | 5 | (12) | 20579.2361 | -403.9  | -2  |
| 9  | 4 | 6  | 9 | 3 | 7 | (12) | 10356.2119 | 1541.3  | 0   |
| 9  | 5 | 4  | 8 | 5 | 3 | (12) | 20066.2770 | 52.5    | 2   |
| 9  | 5 | 4  | 9 | 4 | 5 | (12) | 18556.2765 | -1687.3 | -10 |
| 9  | 5 | 5  | 8 | 5 | 4 | (12) | 20179.7693 | -134.2  | 1   |
| 9  | 6 | 3  | 8 | 6 | 2 | (12) | 19991.3517 | 67.2    | 4   |
| 9  | 6 | 4  | 8 | 6 | 3 | (12) | 20050.5408 | -132.8  | 3   |
| 9  | 7 | 2  | 8 | 7 | 1 | (12) | 19946.6306 | 93.5    | 7   |
| 9  | 7 | 3  | 8 | 7 | 2 | (12) | 19982.8057 | -104.5  | 46  |
| 9  | 8 | 1  | 8 | 8 | 1 | (12) | 19917.4908 | 135.3   | 10  |
| 10 | 0 | 10 | 9 | 0 | 9 | (12) | 19100.4635 | -31.2   | -2  |
| 10 | 0 | 10 | 9 | 1 | 9 | (12) | 19065.2585 | -4.5    | -2  |
| 10 | 1 | 9  | 9 | 1 | 8 | (12) | 21130.3148 | -22     | 1   |
| 10 | 1 | 10 | 9 | 0 | 9 | (12) | 19117.4328 | -48.5   | -3  |

---

|    |   |    |    |   |    |      |            |         |    |
|----|---|----|----|---|----|------|------------|---------|----|
| 10 | 1 | 10 | 9  | 1 | 9  | (12) | 19082.2216 | -28     | -9 |
| 10 | 2 | 8  | 9  | 2 | 7  | (12) | 22745.2075 | 259.6   | -1 |
| 10 | 2 | 8  | 10 | 1 | 9  | (12) | 11204.9914 | -191.3  | -5 |
| 10 | 2 | 9  | 9  | 1 | 8  | (12) | 21574.8819 | -255.7  | 2  |
| 10 | 2 | 9  | 9  | 2 | 8  | (12) | 20822.8617 | 7.8     | 5  |
| 10 | 3 | 7  | 9  | 3 | 6  | (12) | 22797.9604 | 545.8   | -1 |
| 10 | 3 | 7  | 10 | 2 | 8  | (12) | 10809.2727 | -1987.7 | 4  |
| 10 | 3 | 8  | 9  | 3 | 7  | (12) | 22537.8688 | -285.5  | 1  |
| 10 | 3 | 8  | 10 | 2 | 9  | (12) | 13337.0446 | -153.2  | 1  |
| 10 | 4 | 6  | 9  | 4 | 5  | (12) | 22574.4571 | 81.9    | 1  |
| 10 | 4 | 6  | 10 | 3 | 7  | (12) | 14044.0346 | -2525.5 | 11 |
| 10 | 4 | 7  | 9  | 4 | 6  | (12) | 23135.4202 | -676.5  | 0  |
| 10 | 4 | 7  | 10 | 3 | 8  | (12) | 10953.7648 | 1151.8  | 1  |
| 10 | 5 | 5  | 9  | 5 | 4  | (12) | 22361.7722 | 61.7    | 2  |
| 10 | 5 | 6  | 9  | 5 | 5  | (12) | 22529.3894 | -191.7  | 0  |
| 10 | 6 | 4  | 9  | 6 | 3  | (12) | 22257.1044 | 80.1    | 4  |
| 10 | 6 | 5  | 9  | 6 | 4  | (12) | 22339.4421 | -127.2  | 43 |
| 11 | 0 | 11 | 10 | 0 | 10 | (12) | 20910.7104 | -37.6   | -6 |
| 11 | 0 | 11 | 10 | 1 | 10 | (12) | 20893.7442 | -17.1   | -2 |
| 11 | 1 | 10 | 10 | 1 | 9  | (12) | 22868.1036 | -26.1   | 2  |
| 11 | 1 | 11 | 10 | 0 | 10 | (12) | 20918.7554 | -42.9   | -2 |
| 11 | 1 | 11 | 10 | 1 | 10 | (12) | 20901.7857 | -26     | -1 |
| 11 | 2 | 10 | 10 | 1 | 9  | (12) | 23115.5555 | -205.1  | 3  |
| 11 | 2 | 10 | 10 | 2 | 9  | (12) | 22670.9885 | 28.6    | 2  |
| 12 | 0 | 12 | 11 | 0 | 11 | (12) | 22724.2641 | -38     | -2 |
| 12 | 0 | 12 | 11 | 1 | 11 | (12) | 22716.2318 | -20     | 6  |
| 12 | 1 | 11 | 11 | 1 | 10 | (12) | 24623.9988 | -12.4   | 2  |
| 12 | 1 | 12 | 11 | 0 | 11 | (12) | 22728.0213 | -44.1   | -3 |
| 12 | 1 | 12 | 11 | 1 | 11 | (12) | 22719.9847 | -30.3   | 1  |

---
